# Supplementary material for: Maturation and Protection Effect of Retinal Tissue-Derived Bioink for 3D Cell Printing Technology
Source: MDPI journal article supplement (doi:10.3390/pharmaceutics13070934), 2021-06-23
Supplement: s1 [file s1]

# Supplementary Materials: Maturation and Protection Effect of Retinal Tissue-Derived Bioink for 3D Cell Printing Technology

Jongmin Kim, Jeong Sik Kong, Hyeonji Kim, Wonil Han, Jae Yon Won and Dong-Woo Cho

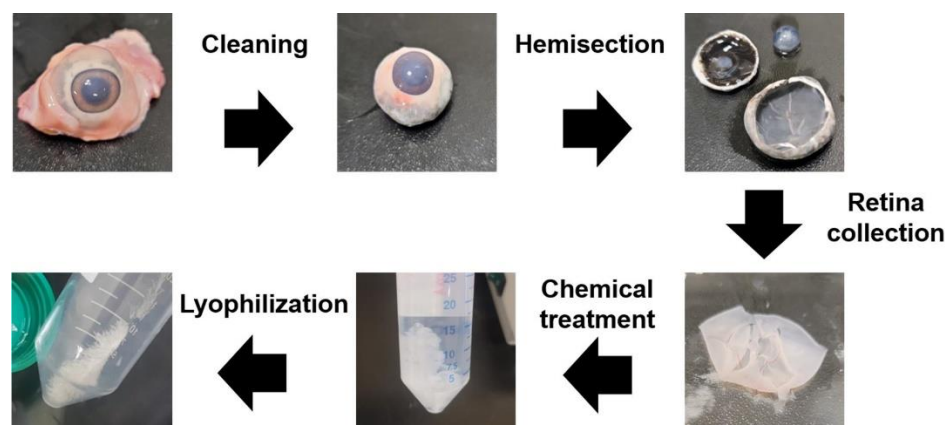

**Figure S1.** Development procedure of retinal decellularized extracellular matrix (RdECM).

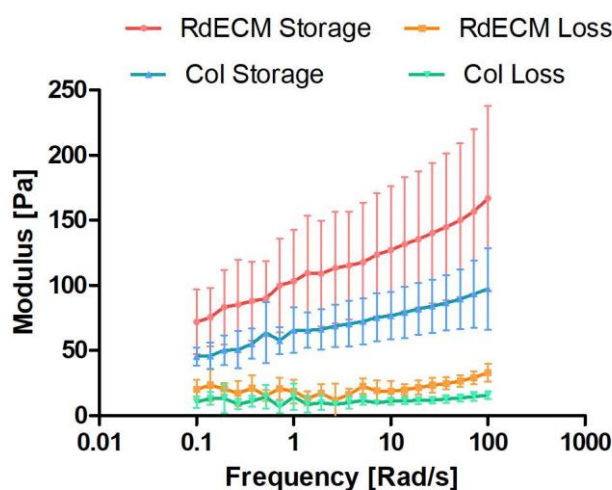

**Figure S2.** Storage and loss modulus of retinal decellularized extracellular matrix (RdECM) bioink and collagen. The error bars represent the standard deviation.

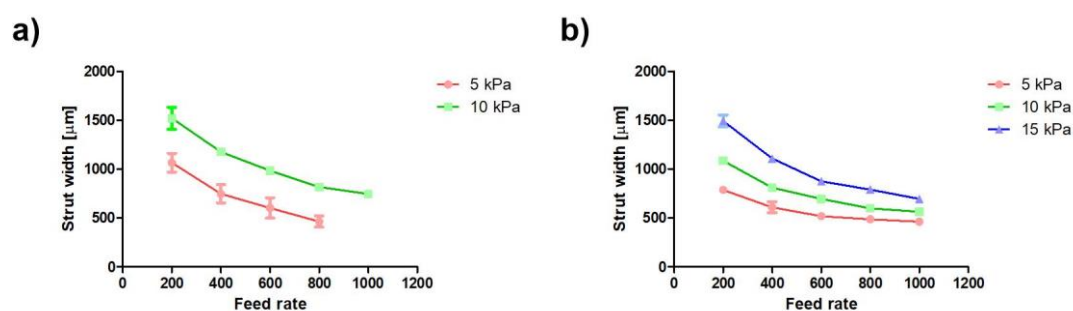

**Figure S3.** Strut width of printed retinal decellularized extracellular matrix (RdECM) bioink using (a) 25-gauge nozzle and (b) 27-gauge nozzle. The error bars represent the standard deviation.

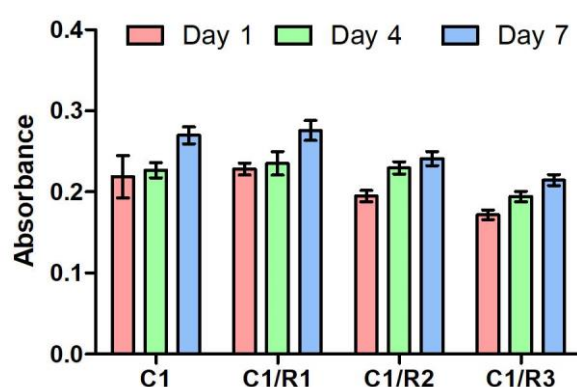

**Figure S4.** Proliferation of mesenchymal stem cell in various compositions of RdECM bioink. C1: 1% Collagen. C1/R1: 1% collagen/ 1% RdECM. C1/R2: 1% collagen/ 2% RdECM. C1/R3: 1% collagen/ 3% RdECM.

**Table S1.** List of antibodies.

| Name            | Manufacture | Host   | Cat #    |
|-----------------|-------------|--------|----------|
| Blue opsin      | Millipore   | Rabbit | AB5407   |
| Red-Green opsin | Millipore   | Rabbit | AB5405   |
| Rhodopsin       | Abcam       | Mouse  | ab5417   |
| GFAP            | Abcam       | Mouse  | ab4648   |
| GS              | Abcam       | Rabbit | ab176562 |

**Table S2.** Mass spectrometric of RdECM using Sus scrofa UniProt database search.

| Checked | Master         | Accession  | Description                                                                              | Coverage [%] | # Peptides | # PSMs | # Unique Peptides | # AAs | MW [kDa] | calc. pI | Score Sequest HT: Sequest HT | # Peptides (by Search Engine): Sequest HT | # Protein Groups |
|---------|----------------|------------|------------------------------------------------------------------------------------------|--------------|------------|--------|-------------------|-------|----------|----------|------------------------------|-------------------------------------------|------------------|
| TRUE    | Master Protein | A0A480M929 | Tubulin beta chain OS=Sus scrofa OX=9823 PE=3 SV=1                                       | 73           | 25         | 93     | 2                 | 445   | 49.9     | 4.89     | 320.88                       | 25                                        | 1                |
| TRUE    | Master Protein | P02543     | Vimentin OS=Sus scrofa OX=9823 GN=VIM PE=1 SV=2                                          | 65           | 34         | 99     | 30                | 466   | 53.6     | 5.12     | 318.74                       | 34                                        | 1                |
| TRUE    | Master Protein | P62802     | Histone H4 OS=Sus scrofa OX=9823 PE=1 SV=2                                               | 57           | 10         | 99     | 10                | 103   | 11.4     | 11.36    | 316.95                       | 10                                        | 1                |
| TRUE    | Master Protein | A0A480VHK4 | Tubulin beta chain OS=Sus scrofa OX=9823 PE=3 SV=1                                       | 72           | 24         | 91     | 0                 | 445   | 49.8     | 4.89     | 309.82                       | 24                                        | 1                |
| TRUE    | Master Protein | Q71LE2     | Histone H3.3 OS=Sus scrofa OX=9823 GN=H3-3A PE=2 SV=3                                    | 60           | 7          | 74     | 2                 | 136   | 15.3     | 11.27    | 307.17                       | 7                                         | 1                |
| TRUE    | Master Protein | A0A287AZ37 | Tubulin beta chain OS=Sus scrofa OX=9823 GN=LOC100624785 PE=1 SV=2                       | 69           | 24         | 88     | 1                 | 465   | 52       | 5.05     | 301.27                       | 24                                        | 1                |
| TRUE    | Master Protein | F2Z5B2     | Tubulin beta chain OS=Sus scrofa OX=9823 GN=TUBB PE=1 SV=2                               | 70           | 23         | 87     | 3                 | 459   | 51.2     | 7.28     | 285.47                       | 23                                        | 1                |
| TRUE    | Master Protein | A0A287BFK0 | Histone H2A OS=Sus scrofa OX=9823 GN=H2AW PE=3 SV=1                                      | 64           | 8          | 68     | 2                 | 130   | 14.1     | 11.05    | 278.66                       | 8                                         | 1                |
| TRUE    | Master Protein | A0A480UV25 | Tubulin beta chain OS=Sus scrofa OX=9823 PE=3 SV=1                                       | 70           | 22         | 82     | 2                 | 444   | 49.6     | 4.88     | 278.52                       | 22                                        | 1                |
| TRUE    | Master Protein | A0A480PJ61 | Histone H2A OS=Sus scrofa OX=9823 PE=3 SV=1                                              | 70           | 10         | 54     | 5                 | 143   | 15.1     | 10.74    | 251.97                       | 10                                        | 1                |
| TRUE    | Master Protein | A0A5G2QML3 | Histone H2B OS=Sus scrofa OX=9823 GN=H1-3 PE=1 SV=1                                      | 41           | 19         | 81     | 4                 | 322   | 33.5     | 10.74    | 245.57                       | 19                                        | 1                |
| TRUE    | Master Protein | F2Z5L5     | Histone H2A OS=Sus scrofa OX=9823 GN=H2AC20 PE=1 SV=1                                    | 64           | 8          | 59     | 2                 | 129   | 14       | 10.9     | 236.21                       | 8                                         | 1                |
| TRUE    | Master Protein | F1RJU4     | Neurofilament light polypeptide OS=Sus scrofa OX=9823 GN=NEFL PE=1 SV=1                  | 49           | 30         | 68     | 27                | 552   | 62.4     | 4.61     | 216.45                       | 30                                        | 1                |
| TRUE    | Master Protein | A0A4X1WCU9 | Tubulin alpha chain OS=Sus scrofa OX=9823 GN=TUBA1A PE=3 SV=1                            | 60           | 16         | 60     | 1                 | 416   | 46.3     | 5.08     | 207.3                        | 16                                        | 1                |
| TRUE    | Master Protein | A0A0B8RZ36 | Spectrin, alpha, non-erythrocytic 1 OS=Sus scrofa domesticus OX=9825 GN=SPTAN1 PE=3 SV=1 | 26           | 49         | 67     | 49                | 2452  | 281.9    | 5.3      | 204.87                       | 49                                        | 1                |
| TRUE    | Master Protein | A0A480IE0  | Tubulin alpha chain OS=Sus scrofa OX=9823 PE=3 SV=1                                      | 49           | 15         | 56     | 0                 | 448   | 49.9     | 5.06     | 196.06                       | 15                                        | 1                |
| TRUE    | Master Protein | A0A480VY62 | 160 kDa neurofilament protein OS=Sus scrofa OX=9823 PE=3 SV=1                            | 21           | 19         | 57     | 4                 | 886   | 99.1     | 4.87     | 182.21                       | 19                                        | 1                |
| TRUE    | Master Protein | A0A480NAY0 | Tubulin alpha chain OS=Sus scrofa OX=9823 PE=3 SV=1                                      | 45           | 13         | 50     | 1                 | 449   | 50.1     | 5.1      | 181.98                       | 13                                        | 1                |
| TRUE    | Master Protein | A0A287B3D7 | Core histone macro-H2A OS=Sus scrofa OX=9823 GN=MACROH2A1 PE=1 SV=2                      | 57           | 14         | 44     | 12                | 369   | 39.2     | 9.83     | 180.13                       | 14                                        | 1                |

|      |                |             |                                                                                        |    |    |    |    |      |       |       |        |    |   |
|------|----------------|-------------|----------------------------------------------------------------------------------------|----|----|----|----|------|-------|-------|--------|----|---|
| TRUE | Master Protein | A0A480IV89  | Tubulin alpha chain OS=Sus scrofa OX=9823 PE=3 SV=1                                    | 47 | 14 | 50 | 1  | 448  | 49.9  | 5.06  | 178.85 | 14 | 1 |
| TRUE | Master Protein | P08552      | Neurofilament medium polypeptide (Fragment) OS=Sus scrofa OX=9823 GN=NEFM PE=1 SV=2    | 38 | 16 | 54 | 1  | 455  | 52    | 5.24  | 173.46 | 16 | 1 |
| TRUE | Master Protein | F1RVA0      | Histone H3 OS=Sus scrofa OX=9823 GN=HIST1H3E PE=2 SV=2                                 | 52 | 6  | 40 | 1  | 136  | 15.4  | 11.12 | 165.16 | 6  | 1 |
| TRUE | Master Protein | A0A287BI D4 | Histone H2B OS=Sus scrofa OX=9823 GN=H2BC21 PE=3 SV=1                                  | 62 | 10 | 53 | 2  | 126  | 13.9  | 10.32 | 164.3  | 10 | 1 |
| TRUE | Master Protein | A0A286ZJ Q0 | Histone H3 OS=Sus scrofa OX=9823 PE=3 SV=1                                             | 52 | 6  | 39 | 1  | 136  | 15.4  | 11.27 | 162.29 | 6  | 1 |
| TRUE | Master Protein | F1RR02      | Glial fibrillary acidic protein OS=Sus scrofa OX=9823 GN=GFAP PE=1 SV=3                | 56 | 26 | 52 | 25 | 468  | 53.6  | 5.85  | 162.08 | 26 | 1 |
| TRUE | Master Protein | Q6QQAQ1     | Actin, cytoplasmic 1 OS=Sus scrofa OX=9823 GN=ACTB PE=1 SV=2                           | 62 | 15 | 46 | 1  | 375  | 41.7  | 5.48  | 157.14 | 15 | 1 |
| TRUE | Master Protein | A0A4X1T EF4 | Tubulin beta chain OS=Sus scrofa OX=9823 PE=3 SV=1                                     | 41 | 17 | 47 | 4  | 455  | 50.2  | 8.44  | 144.93 | 17 | 1 |
| TRUE | Master Protein | A0A4X1W 6K9 | Spectrin beta chain OS=Sus scrofa OX=9823 PE=3 SV=1                                    | 21 | 34 | 42 | 33 | 2361 | 274.1 | 5.58  | 138.01 | 34 | 1 |
| TRUE | Master Protein | F1S847      | Alpha-internexin OS=Sus scrofa OX=9823 GN=INA PE=1 SV=1                                | 48 | 22 | 43 | 19 | 499  | 55.4  | 5.4   | 135.42 | 22 | 1 |
| TRUE | Master Protein | Q4TTS4      | Histone H1.2-like protein OS=Sus scrofa OX=9823 PE=3 SV=1                              | 39 | 13 | 38 | 4  | 213  | 21.4  | 11    | 109.75 | 13 | 1 |
| TRUE | Master Protein | A0A4X1V U50 | Tubulin beta chain OS=Sus scrofa OX=9823 GN=TUBB6 PE=3 SV=1                            | 29 | 11 | 32 | 0  | 444  | 49.4  | 5.48  | 103.99 | 11 | 1 |
| TRUE | Master Protein | A0A480U P67 | Myosin-10 isoform 2 OS=Sus scrofa OX=9823 PE=3 SV=1                                    | 16 | 22 | 29 | 16 | 1976 | 228.7 | 5.55  | 100.57 | 22 | 1 |
| TRUE | Master Protein | A0A4X1T CT0 | Vesicle-fusing ATPase OS=Sus scrofa OX=9823 GN=NSF PE=3 SV=1                           | 30 | 19 | 27 | 19 | 747  | 83    | 6.81  | 89.33  | 19 | 1 |
| TRUE | Master Protein | A0A480Q L86 | Myosin-9 OS=Sus scrofa OX=9823 PE=3 SV=1                                               | 14 | 20 | 27 | 14 | 1967 | 226.7 | 5.53  | 88.45  | 20 | 1 |
| TRUE | Master Protein | Q3ZD69      | Prelamin-A/C OS=Sus scrofa OX=9823 GN=LMNA PE=3 SV=1                                   | 27 | 14 | 25 | 14 | 664  | 74.2  | 7.18  | 83.82  | 14 | 1 |
| TRUE | Master Protein | A0A286Z VLO | Heterogeneous nuclear ribonucleoprotein U OS=Sus scrofa OX=9823 GN=HNRNPU PE=1 SV=1    | 19 | 14 | 28 | 14 | 825  | 90.6  | 5.86  | 83.08  | 14 | 1 |
| TRUE | Master Protein | F1RFH3      | Neurofilament heavy polypeptide OS=Sus scrofa OX=9823 GN=NEFH PE=1 SV=2                | 16 | 14 | 27 | 11 | 847  | 93.4  | 6.13  | 82.45  | 14 | 1 |
| TRUE | Master Protein | A0A4X1V 2S2 | Peptidase S1 domain-containing protein OS=Sus scrofa OX=9823 GN=LOC100302368 PE=4 SV=1 | 24 | 4  | 21 | 4  | 246  | 25.9  | 7.18  | 75.85  | 4  | 1 |
| TRUE | Master Protein | F1RKM0      | Lamin-B1 isoform 1 OS=Sus scrofa OX=9823 GN=LMNB1 PE=1 SV=2                            | 42 | 16 | 24 | 16 | 586  | 66.4  | 5.14  | 73.29  | 16 | 1 |
| TRUE | Master Protein | A0A287A KA3 | Core histone macro-H2A OS=Sus scrofa OX=9823 GN=MACROH2A2 PE=1 SV=1                    | 48 | 11 | 18 | 9  | 372  | 40    | 9.69  | 69.77  | 11 | 1 |
| TRUE | Master Protein | A0A4X1U CH7 | Histone H2A OS=Sus scrofa OX=9823 GN=LOC100512448 PE=3 SV=1                            | 43 | 4  | 19 | 2  | 128  | 13.5  | 10.58 | 66.19  | 4  | 1 |

|      |                |             |                                                                                             |    |    |    |    |      |       |       |       |    |   |
|------|----------------|-------------|---------------------------------------------------------------------------------------------|----|----|----|----|------|-------|-------|-------|----|---|
| TRUE | Master Protein | F1SU06      | Heterochromatin protein 1-binding protein 3 OS=Sus scrofa OX=9823 GN=HP1BP3 PE=1 SV=2       | 29 | 15 | 22 | 15 | 553  | 61.1  | 9.72  | 66.05 | 15 | 1 |
| TRUE | Master Protein | A0A480E WB1 | Histone H1.1 OS=Sus scrofa OX=9823 PE=3 SV=1                                                | 29 | 8  | 22 | 1  | 218  | 22    | 10.87 | 64.6  | 8  | 1 |
| TRUE | Master Protein | K7GND3      | RNA helicase OS=Sus scrofa OX=9823 GN=DHX9 PE=1 SV=2                                        | 14 | 13 | 17 | 13 | 1384 | 149.6 | 6.98  | 63.94 | 13 | 1 |
| TRUE | Master Protein | P06348      | Histone H1t OS=Sus scrofa OX=9823 GN=H1-6 PE=1 SV=1                                         | 20 | 6  | 20 | 1  | 211  | 22    | 11.58 | 59.39 | 6  | 1 |
| TRUE | Master Protein | A0A481C YB2 | Actin, alpha skeletal muscle OS=Sus scrofa OX=9823 PE=3 SV=1                                | 31 | 9  | 20 | 3  | 377  | 42    | 5.39  | 53.65 | 9  | 1 |
| TRUE | Master Protein | A0A4X1V 8T4 | H15 domain-containing protein OS=Sus scrofa OX=9823 GN=LOC100510904 PE=3 SV=1               | 24 | 6  | 19 | 6  | 194  | 20.9  | 10.9  | 49.47 | 6  | 1 |
| TRUE | Master Protein | A0A4X1U 498 | Heterogeneous nuclear ribonucleoproteins A2/B1 OS=Sus scrofa OX=9823 GN=HNRNPA2B1 PE=4 SV=1 | 41 | 10 | 16 | 10 | 361  | 38.4  | 9.07  | 46.65 | 10 | 1 |
| TRUE | Master Protein | A0A4X1U Y93 | Heterogeneous nuclear ribonucleoprotein K OS=Sus scrofa OX=9823 GN=HNRNPK PE=4 SV=1         | 33 | 10 | 14 | 10 | 426  | 46.9  | 5.44  | 44.62 | 10 | 1 |
| TRUE | Master Protein | A0A4X1U YH7 | RRM domain-containing protein OS=Sus scrofa OX=9823 GN=HNRNPC PE=3 SV=1                     | 25 | 7  | 14 | 7  | 317  | 34.9  | 5.08  | 42.47 | 7  | 1 |
| TRUE | Master Protein | F1SP93      | H(+)-transporting two-sector ATPase OS=Sus scrofa OX=9823 GN=ATP6V1A PE=1 SV=2              | 24 | 9  | 12 | 9  | 603  | 66.6  | 5.33  | 42.44 | 9  | 1 |
| TRUE | Master Protein | A0A5G2Q E26 | Methyl-CpG-binding protein 2 OS=Sus scrofa OX=9823 GN=MECP2 PE=1 SV=1                       | 15 | 6  | 12 | 6  | 489  | 52.4  | 9.88  | 37.93 | 6  | 1 |
| TRUE | Master Protein | A0A4X1V 5U6 | Calcium/calmodulin-dependent protein kinase OS=Sus scrofa OX=9823 PE=3 SV=1                 | 21 | 6  | 9  | 4  | 498  | 56.3  | 7.25  | 36.32 | 6  | 1 |
| TRUE | Master Protein | A0A5S6GJ G2 | Serine/arginine-rich splicing factor 1 OS=Sus scrofa OX=9823 GN=SRSF1 PE=1 SV=1             | 42 | 9  | 13 | 8  | 236  | 26.9  | 10.29 | 35.11 | 9  | 1 |
| TRUE | Master Protein | A0A287B E52 | PWWP domain-containing protein OS=Sus scrofa OX=9823 GN=PSIP1 PE=1 SV=2                     | 17 | 6  | 10 | 6  | 530  | 60.1  | 9.13  | 34.97 | 6  | 1 |
| TRUE | Master Protein | A0A4X1T V43 | Creatine kinase OS=Sus scrofa OX=9823 GN=CKB PE=3 SV=1                                      | 21 | 6  | 10 | 6  | 403  | 44.8  | 6     | 33.77 | 6  | 1 |
| TRUE | Master Protein | Q6QAAQ4     | Myosin regulatory light chain (Fragment) OS=Sus scrofa OX=9823 PE=2 SV=1                    | 46 | 5  | 11 | 4  | 132  | 15    | 4.5   | 33.09 | 5  | 1 |
| TRUE | Master Protein | B0LXF7      | Aprotinin (Fragment) OS=Sus scrofa OX=9823 PE=4 SV=1                                        | 26 | 1  | 7  | 1  | 58   | 6.7   | 7.61  | 32.41 | 1  | 1 |
| TRUE | Master Protein | A0A5K1U 8P1 | Clathrin heavy chain OS=Sus scrofa OX=9823 GN=CLTC PE=1 SV=1                                | 6  | 8  | 10 | 8  | 1681 | 192.6 | 5.77  | 32.36 | 8  | 1 |
| TRUE | Master Protein | A0A4X1V S48 | RNA helicase OS=Sus scrofa OX=9823 GN=DDX17 PE=3 SV=1                                       | 19 | 11 | 13 | 6  | 672  | 75    | 8.78  | 32.33 | 11 | 1 |
| TRUE | Master Protein | F1RY92      | RRM domain-containing protein OS=Sus scrofa OX=9823 GN=SRSF3 PE=1 SV=2                      | 34 | 5  | 10 | 4  | 164  | 19.3  | 11.65 | 30.43 | 5  | 1 |
| TRUE | Master Protein | A0A480J9 N1 | Myosin-11 OS=Sus scrofa OX=9823 PE=3 SV=1                                                   | 7  | 9  | 9  | 6  | 1931 | 223.2 | 5.58  | 29.09 | 9  | 1 |
| TRUE | Master Protein | A0A4X1S G58 | Calmodulin OS=Sus scrofa OX=9823 GN=CALM2 PE=3 SV=1                                         | 64 | 4  | 7  | 2  | 83   | 9.3   | 4.03  | 28.64 | 4  | 1 |

|      |                |             |                                                                                                             |    |    |    |   |      |       |       |       |    |   |
|------|----------------|-------------|-------------------------------------------------------------------------------------------------------------|----|----|----|---|------|-------|-------|-------|----|---|
| TRUE | Master Protein | A0A287AHS0  | Calmodulin OS=Sus scrofa OX=9823 GN=CALM3 PE=1 SV=1                                                         | 35 | 4  | 7  | 2 | 148  | 16.7  | 4.22  | 28.64 | 4  | 1 |
| TRUE | Master Protein | A0A480PNA9  | ADP/ATP translocase 2 OS=Sus scrofa OX=9823 PE=3 SV=1                                                       | 33 | 8  | 11 | 2 | 298  | 32.9  | 9.77  | 28.08 | 8  | 1 |
| TRUE | Master Protein | A0A480TAH1  | Myosin-14 isoform 2 OS=Sus scrofa OX=9823 PE=3 SV=1                                                         | 7  | 11 | 11 | 7 | 1974 | 226.5 | 5.54  | 27.96 | 11 | 1 |
| TRUE | Master Protein | A0A4X1TBF9  | ADP/ATP translocase 3 OS=Sus scrofa OX=9823 GN=SLC25A6 PE=3 SV=1                                            | 29 | 7  | 11 | 1 | 297  | 32.8  | 9.92  | 27.4  | 7  | 1 |
| TRUE | Master Protein | A0A287B401  | RNA-binding protein 14 isoform 1 OS=Sus scrofa OX=9823 GN=RBM14 PE=1 SV=1                                   | 14 | 5  | 8  | 5 | 669  | 69.5  | 9.67  | 27.05 | 5  | 1 |
| TRUE | Master Protein | F2Z581      | Histone domain-containing protein OS=Sus scrofa OX=9823 PE=1 SV=3                                           | 33 | 5  | 10 | 1 | 85   | 9.4   | 10.73 | 26.85 | 5  | 1 |
| TRUE | Master Protein | A0A287ANZ8  | Thy-1 antigen OS=Sus scrofa OX=9823 GN=THY1 PE=1 SV=1                                                       | 29 | 4  | 8  | 4 | 154  | 17.2  | 8.94  | 26.51 | 4  | 1 |
| TRUE | Master Protein | A0A287BSR0  | Desmin OS=Sus scrofa OX=9823 GN=DES PE=1 SV=1                                                               | 7  | 4  | 9  | 1 | 471  | 54.1  | 5.21  | 25.5  | 4  | 1 |
| TRUE | Master Protein | A0A287AN50  | Agrin OS=Sus scrofa OX=9823 GN=AGRN PE=1 SV=2                                                               | 5  | 8  | 10 | 8 | 2069 | 218.7 | 6.27  | 25.25 | 8  | 1 |
| TRUE | Master Protein | A0A480IX08  | V-type proton ATPase subunit a OS=Sus scrofa OX=9823 PE=3 SV=1                                              | 13 | 9  | 9  | 9 | 839  | 96.4  | 6.57  | 25.09 | 9  | 1 |
| TRUE | Master Protein | A0A287BRP2  | Guanine nucleotide-binding protein G(T) subunit alpha-1 isoform X2 OS=Sus scrofa OX=9823 GN=GNAT1 PE=1 SV=1 | 21 | 5  | 8  | 3 | 350  | 40    | 5.73  | 24.88 | 5  | 1 |
| TRUE | Master Protein | A0A088RSH5  | Nuclear mitotic apparatus protein 1 OS=Sus scrofa domesticus OX=9825 GN=NUMA1 PE=4 SV=1                     | 6  | 9  | 9  | 9 | 2088 | 233.4 | 5.73  | 24.2  | 9  | 1 |
| TRUE | Master Protein | A0A287BLH5  | DEAD box protein 5 OS=Sus scrofa OX=9823 GN=DDX5 PE=3 SV=2                                                  | 16 | 8  | 9  | 3 | 617  | 69.4  | 9.11  | 23.03 | 8  | 1 |
| TRUE | Master Protein | A0A5G2QCQ9  | Calcium/calmodulin-dependent protein kinase OS=Sus scrofa OX=9823 GN=CAMK2B PE=1 SV=1                       | 11 | 5  | 7  | 2 | 670  | 72.7  | 8.12  | 22.76 | 5  | 1 |
| TRUE | Master Protein | A0A4X1TYS6  | Elongation factor 1-alpha OS=Sus scrofa OX=9823 GN=EEF1A1 PE=3 SV=1                                         | 18 | 7  | 7  | 7 | 450  | 49    | 8.87  | 21.5  | 7  | 1 |
| TRUE | Master Protein | F1SDE3      | Centromere protein V OS=Sus scrofa OX=9823 GN=CENPV PE=1 SV=2                                               | 29 | 4  | 7  | 4 | 259  | 28.1  | 9.89  | 21.48 | 4  | 1 |
| TRUE | Master Protein | A0A4X1W8E1  | WD_REPEATS_REGION domain-containing protein OS=Sus scrofa OX=9823 GN=GNB1 PE=3 SV=1                         | 17 | 4  | 6  | 1 | 340  | 37.4  | 6     | 21.43 | 4  | 1 |
| TRUE | Master Protein | A0A4X1V RD7 | FERM domain-containing protein OS=Sus scrofa OX=9823 PE=4 SV=1                                              | 7  | 5  | 6  | 5 | 1196 | 132.2 | 5.2   | 20.8  | 5  | 1 |
| TRUE | Master Protein | A0A4X1TYS5  | Dynamin GTPase OS=Sus scrofa OX=9823 PE=3 SV=1                                                              | 12 | 7  | 8  | 7 | 863  | 97.1  | 7.74  | 20.78 | 7  | 1 |
| TRUE | Master Protein | A0A4X1TS37  | Heat shock protein HSP 90-alpha OS=Sus scrofa OX=9823 GN=HSP90AA1 PE=3 SV=1                                 | 11 | 7  | 8  | 7 | 789  | 90.6  | 5.02  | 20.47 | 7  | 1 |
| TRUE | Master Protein | A0A287A6P1  | Actin-depolymerizing factor OS=Sus scrofa OX=9823 GN=GSN PE=3 SV=2                                          | 11 | 5  | 6  | 1 | 780  | 85.6  | 6.47  | 20.15 | 5  | 1 |
| TRUE | Master Protein | A0A287AMM6  | MICOS complex subunit MIC60 OS=Sus scrofa OX=9823 GN=IMMT PE=1 SV=1                                         | 10 | 5  | 6  | 5 | 746  | 82.6  | 6.61  | 19.68 | 5  | 1 |

|      |                |            |                                                                                        |    |   |   |   |      |       |       |       |   |   |
|------|----------------|------------|----------------------------------------------------------------------------------------|----|---|---|---|------|-------|-------|-------|---|---|
| TRUE | Master Protein | A0A481B449 | Actin-depolymerizing factor OS=Sus scrofa OX=9823 PE=3 SV=1                            | 11 | 5 | 6 | 1 | 660  | 71.9  | 6.73  | 18.77 | 5 | 1 |
| TRUE | Master Protein | A0A4X1UES8 | WD_REPEATS_REGION domain-containing protein OS=Sus scrofa OX=9823 GN=GNB2 PE=3 SV=1    | 17 | 4 | 5 | 1 | 340  | 37.3  | 6     | 18.7  | 4 | 1 |
| TRUE | Master Protein | I3LGB1     | Aryl-hydrocarbon-interacting protein-like 1 OS=Sus scrofa OX=9823 GN=AIPL1 PE=1 SV=2   | 19 | 5 | 6 | 5 | 328  | 38.3  | 6.14  | 18.67 | 5 | 1 |
| TRUE | Master Protein | A0A480YZR2 | Cytoskeleton-associated protein 4 OS=Sus scrofa OX=9823 PE=4 SV=1                      | 15 | 6 | 6 | 6 | 592  | 64.7  | 5.73  | 18.53 | 6 | 1 |
| TRUE | Master Protein | A0A480UKG6 | Vacuolar proton pump subunit B OS=Sus scrofa OX=9823 PE=3 SV=1                         | 17 | 6 | 6 | 6 | 511  | 56.6  | 5.81  | 18.16 | 6 | 1 |
| TRUE | Master Protein | A0A480PZC9 | Calcium/calmodulin-dependent protein kinase OS=Sus scrofa OX=9823 PE=3 SV=1            | 14 | 5 | 6 | 2 | 542  | 60.3  | 7.17  | 17.93 | 5 | 1 |
| TRUE | Master Protein | K7GSR6     | Ecto-5'-nucleotidase OS=Sus scrofa OX=9823 GN=NT5E PE=1 SV=1                           | 12 | 5 | 6 | 5 | 574  | 62.8  | 6.68  | 17.7  | 5 | 1 |
| TRUE | Master Protein | A0A4X1U5K3 | S-arrestin OS=Sus scrofa OX=9823 GN=SAG PE=3 SV=1                                      | 15 | 4 | 6 | 4 | 394  | 43.9  | 7.11  | 17.52 | 4 | 1 |
| TRUE | Master Protein | A0A287B770 | RRM domain-containing protein OS=Sus scrofa OX=9823 GN=SRSF10 PE=1 SV=2                | 18 | 5 | 6 | 5 | 261  | 31.2  | 11.27 | 17.16 | 5 | 1 |
| TRUE | Master Protein | A0A4X1U9Z4 | Nucleoplasmin domain-containing protein OS=Sus scrofa OX=9823 GN=NPM1 PE=3 SV=1        | 17 | 3 | 5 | 3 | 259  | 28.4  | 4.69  | 16.98 | 3 | 1 |
| TRUE | Master Protein | K7GT43     | Structural maintenance of chromosomes protein OS=Sus scrofa OX=9823 GN=SMC1A PE=1 SV=2 | 6  | 6 | 6 | 6 | 1187 | 138   | 8.72  | 16.77 | 6 | 1 |
| TRUE | Master Protein | A0A4X1ST13 | Protein kinase C OS=Sus scrofa OX=9823 GN=PRKCA PE=3 SV=1                              | 12 | 6 | 6 | 2 | 688  | 78.7  | 7.36  | 15.43 | 6 | 1 |
| TRUE | Master Protein | I3LSU1     | Non-POU domain containing octamer binding OS=Sus scrofa OX=9823 GN=NONO PE=1 SV=2      | 14 | 5 | 5 | 5 | 543  | 62.4  | 9.35  | 15.34 | 5 | 1 |
| TRUE | Master Protein | P31006     | Guanylate kinase OS=Sus scrofa OX=9823 GN=GUK1 PE=1 SV=2                               | 20 | 3 | 5 | 3 | 198  | 21.9  | 6.95  | 15.11 | 3 | 1 |
| TRUE | Master Protein | A0A287BSC3 | Alkaline phosphatase OS=Sus scrofa OX=9823 GN=ALPL PE=1 SV=2                           | 8  | 5 | 6 | 5 | 834  | 91.2  | 8.7   | 15.06 | 5 | 1 |
| TRUE | Master Protein | A0A5S6G3Y8 | Heat shock 27 kDa protein OS=Sus scrofa OX=9823 GN=HSPB1 PE=3 SV=1                     | 11 | 3 | 5 | 3 | 365  | 40.3  | 10.55 | 14.94 | 3 | 1 |
| TRUE | Master Protein | A0A286ZPE3 | Helix-destabilizing protein OS=Sus scrofa OX=9823 GN=HNRNPA1 PE=1 SV=1                 | 10 | 3 | 5 | 3 | 373  | 38.8  | 9.13  | 14.89 | 3 | 1 |
| TRUE | Master Protein | A0A286ZNE8 | VWFA domain-containing protein OS=Sus scrofa OX=9823 GN=CACNA2D2 PE=1 SV=2             | 4  | 4 | 5 | 4 | 1068 | 121.1 | 5.41  | 14.25 | 4 | 1 |
| TRUE | Master Protein | A0A480W6B7 | Tyrosine-protein kinase BAZ1B isoform X1 OS=Sus scrofa OX=9823 PE=4 SV=1               | 4  | 4 | 5 | 4 | 1418 | 162   | 8.68  | 14.2  | 4 | 1 |
| TRUE | Master Protein | A0A287AGF9 | Nop domain-containing protein OS=Sus scrofa OX=9823 GN=NOP58 PE=1 SV=2                 | 8  | 3 | 4 | 3 | 537  | 60.4  | 8.56  | 13.99 | 3 | 1 |
| TRUE | Master Protein | A0A480WOD4 | Heterogeneous nuclear ribonucleoprotein A3 isoform a OS=Sus scrofa OX=9823 PE=4 SV=1   | 20 | 5 | 5 | 5 | 378  | 39.6  | 9.01  | 13.62 | 5 | 1 |
| TRUE | Master Protein | P62272     | 40S ribosomal protein S18 OS=Sus scrofa OX=9823 GN=RPS18 PE=1 SV=3                     | 30 | 5 | 6 | 5 | 152  | 17.7  | 10.99 | 13.53 | 5 | 1 |

|      |                |            |                                                                                                                               |    |   |   |   |      |       |       |       |   |   |
|------|----------------|------------|-------------------------------------------------------------------------------------------------------------------------------|----|---|---|---|------|-------|-------|-------|---|---|
| TRUE | Master Protein | A0A4X1V3C3 | Small nuclear ribonucleoprotein Sm D3 OS=Sus scrofa OX=9823 GN=SNRPD3 PE=3 SV=1                                               | 31 | 3 | 4 | 3 | 126  | 13.9  | 10.32 | 13.26 | 3 | 1 |
| TRUE | Master Protein | A0A0B8R5A0 | Solute carrier family 25 (Mitochondrial carrier: glutamate), member 22 OS=Sus scrofa domesticus OX=9825 GN=SLC25A22 PE=3 SV=1 | 16 | 5 | 5 | 5 | 322  | 34.4  | 9.54  | 13.03 | 5 | 1 |
| TRUE | Master Protein | A0A4X1U434 | Peptidylprolyl isomerase OS=Sus scrofa OX=9823 PE=4 SV=1                                                                      | 7  | 3 | 4 | 3 | 604  | 63.7  | 7.05  | 12.99 | 3 | 1 |
| TRUE | Master Protein | A0A4X1TWR8 | H15 domain-containing protein OS=Sus scrofa OX=9823 GN=LOC100516295 PE=3 SV=1                                                 | 18 | 4 | 5 | 4 | 214  | 22.5  | 10.71 | 12.92 | 4 | 1 |
| TRUE | Master Protein | A0A481A9M2 | IgLON family member 5 OS=Sus scrofa OX=9823 GN=LOC110261043 PE=4 SV=1                                                         | 19 | 5 | 5 | 5 | 348  | 38.2  | 6.76  | 12.68 | 5 | 1 |
| TRUE | Master Protein | A0A5G2QFH4 | RRM domain-containing protein OS=Sus scrofa OX=9823 GN=TRA2B PE=1 SV=1                                                        | 16 | 2 | 4 | 2 | 188  | 21.9  | 10.15 | 12.63 | 2 | 1 |
| TRUE | Master Protein | A0A480W7D9 | Telomeric repeat-binding factor 2 isoform X2 OS=Sus scrofa OX=9823 PE=4 SV=1                                                  | 11 | 3 | 4 | 3 | 288  | 31.7  | 9.54  | 12.51 | 3 | 1 |
| TRUE | Master Protein | Q9MZ15     | Voltage-dependent anion-selective channel protein 2 OS=Sus scrofa OX=9823 GN=VDAC2 PE=2 SV=1                                  | 20 | 4 | 4 | 4 | 294  | 31.6  | 7.56  | 12.41 | 4 | 1 |
| TRUE | Master Protein | A0A480JVL5 | RNA-binding protein with serine-rich domain 1 OS=Sus scrofa OX=9823 GN=RNPS1 PE=1 SV=1                                        | 8  | 2 | 4 | 2 | 305  | 34.2  | 11.84 | 12.39 | 2 | 1 |
| TRUE | Master Protein | A0A480Y9K7 | Opioid-binding protein/cell adhesion molecule isoform b OS=Sus scrofa OX=9823 PE=4 SV=1                                       | 22 | 4 | 4 | 3 | 345  | 38    | 6.77  | 12.31 | 4 | 1 |
| TRUE | Master Protein | K9J4L8     | Protein kinase C OS=Sus scrofa OX=9823 GN=PRKCB_tv2 PE=1 SV=1                                                                 | 10 | 5 | 5 | 1 | 673  | 76.9  | 7.02  | 12.28 | 5 | 1 |
| TRUE | Master Protein | A0A5G2QFK1 | RNA helicase OS=Sus scrofa OX=9823 GN=EIF4A3 PE=3 SV=1                                                                        | 11 | 3 | 4 | 3 | 390  | 44.5  | 6.47  | 12.18 | 3 | 1 |
| TRUE | Master Protein | A0A0B8RTL5 | Heterogeneous nuclear ribonucleoprotein R OS=Sus scrofa domesticus OX=9825 GN=HNRNPR PE=4 SV=1                                | 5  | 2 | 4 | 2 | 532  | 59.6  | 9.16  | 12.17 | 2 | 1 |
| TRUE | Master Protein | A0A4X1SKZ9 | VWFA domain-containing protein OS=Sus scrofa OX=9823 GN=CACNA2D1 PE=3 SV=1                                                    | 5  | 4 | 5 | 4 | 1084 | 122.3 | 5.2   | 12.04 | 4 | 1 |
| TRUE | Master Protein | A0A4X1TSA4 | Protein unc-119 homolog A OS=Sus scrofa OX=9823 GN=UNC119 PE=3 SV=1                                                           | 17 | 3 | 4 | 3 | 240  | 26.9  | 6.15  | 11.93 | 3 | 1 |
| TRUE | Master Protein | A0A480W9G4 | 40S ribosomal protein S13 OS=Sus scrofa OX=9823 PE=3 SV=1                                                                     | 20 | 3 | 4 | 3 | 148  | 16.9  | 10.45 | 11.86 | 3 | 1 |
| TRUE | Master Protein | A0A287BRY0 | Tropomyosin alpha-1 chain OS=Sus scrofa OX=9823 GN=TPM1 PE=1 SV=2                                                             | 19 | 4 | 5 | 2 | 248  | 28.7  | 4.77  | 11.68 | 4 | 1 |
| TRUE | Master Protein | A0A4X1TGS8 | Myosin regulatory light polypeptide 9 OS=Sus scrofa OX=9823 GN=MYL9 PE=4 SV=1                                                 | 12 | 2 | 5 | 1 | 172  | 19.8  | 4.82  | 11.65 | 2 | 1 |
| TRUE | Master Protein | A0A5G2RGK0 | Purine rich element binding protein A OS=Sus scrofa OX=9823 GN=PURA PE=1 SV=1                                                 | 12 | 3 | 3 | 3 | 482  | 50.5  | 8.43  | 11.62 | 3 | 1 |
| TRUE | Master Protein | A0A4X1V3Y1 | SAP domain-containing protein OS=Sus scrofa OX=9823 GN=ACIN1 PE=4 SV=1                                                        | 4  | 4 | 5 | 4 | 1252 | 141.4 | 6.14  | 11.4  | 4 | 1 |
| TRUE | Master Protein | A0A4X1UWL5 | Cellular retinoic acid-binding protein 1 OS=Sus scrofa OX=9823 GN=CRABP1 PE=3 SV=1                                            | 53 | 4 | 4 | 4 | 110  | 12.5  | 5.3   | 11.32 | 4 | 1 |
| TRUE | Master Protein | A0A4X1UGM9 | SEC7 domain-containing protein OS=Sus scrofa OX=9823 PE=3 SV=1                                                                | 4  | 4 | 5 | 4 | 1203 | 129   | 6.55  | 11.17 | 4 | 1 |



|      |                |            |                                                                                              |    |   |   |   |      |       |       |       |   |   |
|------|----------------|------------|----------------------------------------------------------------------------------------------|----|---|---|---|------|-------|-------|-------|---|---|
| TRUE | Master Protein | F1RN35     | G protein-coupled receptor kinase OS=Sus scrofa OX=9823 GN=GRK1 PE=1 SV=1                    | 5  | 2 | 4 | 2 | 564  | 63.3  | 5.78  | 11.17 | 2 | 1 |
| TRUE | Master Protein | P46410     | Glutamine synthetase OS=Sus scrofa OX=9823 GN=GLUL PE=2 SV=3                                 | 13 | 5 | 5 | 5 | 373  | 42    | 6.74  | 11.07 | 5 | 1 |
| TRUE | Master Protein | O62680     | CD59 glycoprotein OS=Sus scrofa OX=9823 GN=CD59 PE=1 SV=1                                    | 9  | 1 | 3 | 1 | 123  | 13.8  | 7.94  | 10.94 | 1 | 1 |
| TRUE | Master Protein | A0A4X1T5Y2 | High mobility group AT-hook protein 1 OS=Sus scrofa OX=9823 GN=HMGA1 PE=3 SV=1               | 15 | 1 | 3 | 1 | 107  | 11.6  | 10.32 | 10.91 | 1 | 1 |
| TRUE | Master Protein | A0A287B5N7 | Tropomyosin alpha-1 chain OS=Sus scrofa OX=9823 GN=TPM1 PE=1 SV=2                            | 11 | 3 | 4 | 1 | 351  | 40    | 4.75  | 10.85 | 3 | 1 |
| TRUE | Master Protein | A0A5G2QMG4 | Unconventional myosin-6 OS=Sus scrofa OX=9823 GN=MYO6 PE=1 SV=1                              | 4  | 4 | 4 | 4 | 1226 | 141.6 | 8.44  | 10.83 | 4 | 1 |
| TRUE | Master Protein | A0A480SLY1 | Tropomyosin alpha-3 chain isoform Tpm3.3cy OS=Sus scrofa OX=9823 PE=3 SV=1                   | 16 | 3 | 4 | 1 | 248  | 28.7  | 4.72  | 10.79 | 3 | 1 |
| TRUE | Master Protein | A1XQS3     | Mitochondrial NDUFA4 OS=Sus scrofa OX=9823 GN=NDUFA4 PE=2 SV=1                               | 28 | 2 | 4 | 2 | 82   | 9.3   | 9.38  | 10.51 | 2 | 1 |
| TRUE | Master Protein | A0A4X1U2F8 | Histone deacetylase complex subunit SAP18 OS=Sus scrofa OX=9823 GN=SAP18 PE=3 SV=1           | 23 | 2 | 3 | 2 | 153  | 17.6  | 9.35  | 10.4  | 2 | 1 |
| TRUE | Master Protein | A0A4X1TV68 | Signal recognition particle receptor subunit beta OS=Sus scrofa OX=9823 PE=3 SV=1            | 17 | 3 | 4 | 3 | 271  | 29.9  | 9.33  | 10.25 | 3 | 1 |
| TRUE | Master Protein | Q0Z8U2     | 40S ribosomal protein S3 OS=Sus scrofa OX=9823 GN=RPS3 PE=1 SV=1                             | 16 | 3 | 4 | 3 | 243  | 26.7  | 9.66  | 10.23 | 3 | 1 |
| TRUE | Master Protein | A0A287B5Y5 | RNA helicase OS=Sus scrofa OX=9823 GN=DHX15 PE=1 SV=1                                        | 5  | 4 | 4 | 4 | 766  | 87.8  | 7.24  | 9.63  | 4 | 1 |
| TRUE | Master Protein | A1XQU3     | 60S ribosomal protein L14 OS=Sus scrofa OX=9823 GN=RPL14 PE=1 SV=1                           | 6  | 1 | 3 | 1 | 213  | 23.3  | 10.77 | 9.4   | 1 | 1 |
| TRUE | Master Protein | A0A287AV47 | PWI domain-containing protein OS=Sus scrofa OX=9823 GN=SRRM1 PE=1 SV=1                       | 4  | 1 | 2 | 1 | 968  | 109.3 | 11.71 | 9.31  | 1 | 1 |
| TRUE | Master Protein | I3L8C5     | Heat shock 70 kDa protein 12A isoform 2 OS=Sus scrofa OX=9823 GN=HSPA12A PE=1 SV=1           | 7  | 4 | 4 | 4 | 675  | 74.8  | 6.61  | 9.27  | 4 | 1 |
| TRUE | Master Protein | Q0QEV2     | Ribosomal protein L18 (Fragment) OS=Sus scrofa OX=9823 GN=RPL18 PE=2 SV=1                    | 15 | 2 | 3 | 2 | 166  | 18.9  | 11.78 | 9.2   | 2 | 1 |
| TRUE | Master Protein | A0A4X1W8J3 | TAR DNA-binding protein 43 OS=Sus scrofa OX=9823 PE=4 SV=1                                   | 10 | 3 | 3 | 3 | 435  | 47.2  | 7.31  | 9.17  | 3 | 1 |
| TRUE | Master Protein | A0A4X1SVK7 | Repressor/activator protein 1 homolog OS=Sus scrofa OX=9823 PE=3 SV=1                        | 10 | 3 | 3 | 3 | 401  | 44.3  | 4.77  | 9.16  | 3 | 1 |
| TRUE | Master Protein | A0A5G2R0B1 | Hexokinase OS=Sus scrofa OX=9823 GN=HK1 PE=1 SV=1                                            | 5  | 4 | 4 | 4 | 779  | 86.7  | 7.28  | 9.15  | 4 | 1 |
| TRUE | Master Protein | A0A4X1UX38 | Voltage-dependent anion-selective channel protein 1 OS=Sus scrofa OX=9823 GN=VDAC1 PE=3 SV=1 | 14 | 4 | 4 | 3 | 302  | 33    | 8.69  | 8.99  | 4 | 1 |
| TRUE | Master Protein | A0A287BFM2 | SAM domain-containing protein OS=Sus scrofa OX=9823 GN=SAMD11 PE=1 SV=2                      | 6  | 3 | 3 | 3 | 683  | 72.9  | 7.33  | 8.98  | 3 | 1 |
| TRUE | Master Protein | A0A4X1TI48 | Nucleolin OS=Sus scrofa OX=9823 GN=NCL PE=4 SV=1                                             | 3  | 2 | 3 | 2 | 699  | 75.2  | 4.63  | 8.92  | 2 | 1 |

|      |                |            |                                                                                                |    |   |   |   |      |       |       |      |   |   |
|------|----------------|------------|------------------------------------------------------------------------------------------------|----|---|---|---|------|-------|-------|------|---|---|
| TRUE | Master Protein | A0A4X1VYE4 | 60S ribosomal protein L13a OS=Sus scrofa OX=9823 GN=RPL13A PE=3 SV=1                           | 12 | 2 | 3 | 2 | 204  | 23.7  | 11.09 | 8.85 | 2 | 1 |
| TRUE | Master Protein | I3LDH3     | Poly [ADP-ribose] polymerase OS=Sus scrofa OX=9823 GN=PARP1 PE=1 SV=3                          | 5  | 4 | 4 | 4 | 1017 | 113.1 | 8.87  | 8.82 | 4 | 1 |
| TRUE | Master Protein | A0A4X1W191 | DZF domain-containing protein OS=Sus scrofa OX=9823 GN=ILF2 PE=4 SV=1                          | 12 | 3 | 3 | 3 | 390  | 43    | 5.26  | 8.77 | 3 | 1 |
| TRUE | Master Protein | P00355     | Glyceraldehyde-3-phosphate dehydrogenase OS=Sus scrofa OX=9823 GN=GAPDH PE=1 SV=4              | 15 | 3 | 3 | 3 | 333  | 35.8  | 8.35  | 8.72 | 3 | 1 |
| TRUE | Master Protein | Q06AS7     | GBI1 OS=Sus scrofa OX=9823 PE=2 SV=1                                                           | 8  | 2 | 3 | 1 | 355  | 40.5  | 5.38  | 8.5  | 2 | 1 |
| TRUE | Master Protein | A0A480RU92 | Aspartate--tRNA ligase, cytoplasmic OS=Sus scrofa OX=9823 PE=3 SV=1                            | 8  | 3 | 3 | 3 | 482  | 55    | 5.87  | 8.46 | 3 | 1 |
| TRUE | Master Protein | A0A287A4F2 | Splicing factor, proline-and glutamine-rich isoform X1 OS=Sus scrofa OX=9823 GN=SFPQ PE=4 SV=1 | 5  | 3 | 3 | 3 | 702  | 75.5  | 9.44  | 8.33 | 3 | 1 |
| TRUE | Master Protein | A0A287AQ2  | Phosphoglycerate mutase OS=Sus scrofa OX=9823 GN=PGAM1 PE=1 SV=1                               | 16 | 3 | 3 | 3 | 254  | 28.8  | 7.18  | 8.14 | 3 | 1 |
| TRUE | Master Protein | A0A556HMS9 | RNA-binding protein 4B OS=Sus scrofa OX=9823 GN=RBM4B PE=1 SV=1                                | 11 | 3 | 3 | 1 | 369  | 41.1  | 6.8   | 8.02 | 3 | 1 |
| TRUE | Master Protein | A0A5G2QD67 | Galectin OS=Sus scrofa OX=9823 GN=LGALS1 PE=1 SV=1                                             | 15 | 2 | 3 | 2 | 164  | 17.9  | 5.05  | 8.01 | 2 | 1 |
| TRUE | Master Protein | A0A287AY86 | Microtubule-associated protein OS=Sus scrofa OX=9823 GN=MAP4 PE=1 SV=1                         | 2  | 3 | 3 | 3 | 2220 | 235.7 | 6.02  | 7.99 | 3 | 1 |
| TRUE | Master Protein | A0A4X1W115 | Small nuclear ribonucleoprotein Sm D2 OS=Sus scrofa OX=9823 GN=SNRPD2 PE=3 SV=1                | 16 | 2 | 3 | 2 | 118  | 13.5  | 9.91  | 7.89 | 2 | 1 |
| TRUE | Master Protein | A0A480LV60 | E3 SUMO-protein ligase RanBP2 isoform X6 OS=Sus scrofa OX=9823 PE=4 SV=1                       | 1  | 3 | 3 | 3 | 3132 | 346.4 | 6.23  | 7.7  | 3 | 1 |
| TRUE | Master Protein | Q197W4     | Cyclin-dependent kinase 5 OS=Sus scrofa OX=9823 GN=CDK5 PE=1 SV=2                              | 8  | 2 | 3 | 2 | 292  | 33.3  | 7.66  | 7.38 | 2 | 1 |
| TRUE | Master Protein | A0A287AFC3 | ELAV-like protein OS=Sus scrofa OX=9823 GN=ELAVL1 PE=1 SV=1                                    | 11 | 3 | 3 | 3 | 303  | 33.5  | 8.24  | 7.32 | 3 | 1 |
| TRUE | Master Protein | A0A480VB01 | U2 snRNP-associated SURP motif-containing protein isoform 2 OS=Sus scrofa OX=9823 PE=4 SV=1    | 4  | 3 | 3 | 3 | 1028 | 118.1 | 8.47  | 7.31 | 3 | 1 |
| TRUE | Master Protein | F1RUT1     | RNA-binding protein 4 isoform 1 OS=Sus scrofa OX=9823 GN=RBM14 PE=1 SV=3                       | 11 | 3 | 3 | 1 | 365  | 40.4  | 7.08  | 7.23 | 3 | 1 |
| TRUE | Master Protein | F2Z5F5     | 40S ribosomal protein S8 OS=Sus scrofa OX=9823 GN=RPS8 PE=1 SV=3                               | 11 | 2 | 3 | 2 | 208  | 24.2  | 10.32 | 7.18 | 2 | 1 |
| TRUE | Master Protein | A0A4X1UJS8 | V-type proton ATPase subunit OS=Sus scrofa OX=9823 GN=ATP6V0D1 PE=3 SV=1                       | 11 | 3 | 3 | 3 | 351  | 40.3  | 5     | 7.11 | 3 | 1 |
| TRUE | Master Protein | A0A0B8RZ10 | Ubiquitin-activating enzyme E1 OS=Sus scrofa domesticus OX=9825 GN=UBA1 PE=3 SV=1              | 3  | 2 | 2 | 2 | 1058 | 117.7 | 5.85  | 7.1  | 2 | 1 |
| TRUE | Master Protein | A0A5G2R7S1 | LEM domain-containing protein OS=Sus scrofa OX=9823 GN=EMD PE=4 SV=1                           | 7  | 1 | 2 | 1 | 224  | 24.9  | 4.87  | 7.05 | 1 | 1 |
| TRUE | Master Protein | A0A481C3R6 | Pre-mRNA-processing-splicing factor 8 isoform X1 OS=Sus scrofa OX=9823 PE=4 SV=1               | 2  | 2 | 2 | 2 | 1649 | 194.8 | 9.14  | 6.97 | 2 | 1 |

|      |                |            |                                                                                              |    |   |   |   |      |       |       |      |   |   |
|------|----------------|------------|----------------------------------------------------------------------------------------------|----|---|---|---|------|-------|-------|------|---|---|
| TRUE | Master Protein | A0A4X1VFI7 | ADP-ribosyl cyclase/cyclic ADP-ribose hydrolase OS=Sus scrofa OX=9823 PE=3 SV=1              | 11 | 2 | 2 | 2 | 289  | 32.1  | 6.3   | 6.95 | 2 | 1 |
| TRUE | Master Protein | A0A4X1VQM3 | Clathrin light chain OS=Sus scrofa OX=9823 PE=3 SV=1                                         | 14 | 2 | 2 | 2 | 211  | 23.1  | 4.53  | 6.91 | 2 | 1 |
| TRUE | Master Protein | A0A4X1SJ12 | Nop domain-containing protein OS=Sus scrofa OX=9823 GN=NOP56 PE=3 SV=1                       | 6  | 3 | 3 | 3 | 596  | 66.1  | 9.36  | 6.85 | 3 | 1 |
| TRUE | Master Protein | A0A480V6N0 | Double-stranded RNA-specific adenosine deaminase isoform X5 OS=Sus scrofa OX=9823 PE=4 SV=1  | 4  | 2 | 2 | 2 | 617  | 68.9  | 9.38  | 6.76 | 2 | 1 |
| TRUE | Master Protein | Q29380     | Voltage-dependent anion-selective channel protein 3 OS=Sus scrofa OX=9823 GN=VDAC3 PE=2 SV=2 | 10 | 2 | 2 | 1 | 283  | 30.6  | 8.66  | 6.71 | 2 | 1 |
| TRUE | Master Protein | F1SIT7     | 60S acidic ribosomal protein P1 OS=Sus scrofa OX=9823 GN=RPLP1 PE=1 SV=1                     | 29 | 2 | 2 | 2 | 114  | 11.5  | 4.32  | 6.57 | 2 | 1 |
| TRUE | Master Protein | A0A5G2R2A7 | 60S ribosomal protein L4 OS=Sus scrofa OX=9823 GN=RPL4 PE=1 SV=1                             | 7  | 2 | 2 | 2 | 417  | 47.2  | 10.8  | 6.49 | 2 | 1 |
| TRUE | Master Protein | F1SA23     | Retinol dehydrogenase 12 OS=Sus scrofa OX=9823 GN=RDH12 PE=1 SV=2                            | 11 | 3 | 3 | 3 | 316  | 35.1  | 9.63  | 6.48 | 3 | 1 |
| TRUE | Master Protein | A0A287A014 | 40S ribosomal protein S15a OS=Sus scrofa OX=9823 GN=RPS15A PE=1 SV=1                         | 26 | 3 | 3 | 3 | 100  | 11.5  | 10.15 | 6.48 | 3 | 1 |
| TRUE | Master Protein | A0A480YVB6 | RNA helicase OS=Sus scrofa OX=9823 PE=4 SV=1                                                 | 5  | 2 | 2 | 2 | 508  | 57.6  | 5.99  | 5.95 | 2 | 1 |
| TRUE | Master Protein | A0A287AUY5 | PWWP domain-containing protein OS=Sus scrofa OX=9823 GN=HDGFL3 PE=1 SV=1                     | 8  | 1 | 2 | 1 | 203  | 22.6  | 7.99  | 5.85 | 1 | 1 |
| TRUE | Master Protein | A0A4X1VUP5 | PHB domain-containing protein OS=Sus scrofa OX=9823 GN=ERLIN2 PE=3 SV=1                      | 7  | 2 | 2 | 2 | 363  | 40.2  | 6.2   | 5.84 | 2 | 1 |
| TRUE | Master Protein | A0A480WC71 | Band 4.1-like protein 2 isoform X7 OS=Sus scrofa OX=9823 PE=4 SV=1                           | 4  | 2 | 2 | 2 | 865  | 96.4  | 5.58  | 5.83 | 2 | 1 |
| TRUE | Master Protein | A0A4X1UZN2 | V-type proton ATPase subunit G OS=Sus scrofa OX=9823 GN=ATP6V1G1 PE=3 SV=1                   | 14 | 1 | 2 | 1 | 118  | 13.7  | 8.43  | 5.72 | 1 | 1 |
| TRUE | Master Protein | A0A480HRR5 | Elongation factor Tu OS=Sus scrofa OX=9823 PE=3 SV=1                                         | 5  | 2 | 2 | 2 | 566  | 61.3  | 8.32  | 5.71 | 2 | 1 |
| TRUE | Master Protein | A0A480EKD7 | Kin of IRRE-like protein 1 isoform X1 OS=Sus scrofa OX=9823 GN=KIRREL1 PE=4 SV=1             | 5  | 1 | 1 | 1 | 773  | 84.9  | 5.67  | 5.63 | 1 | 1 |
| TRUE | Master Protein | A0A4X1UE92 | Spectrin beta chain OS=Sus scrofa OX=9823 GN=SPTB PE=3 SV=1                                  | 1  | 2 | 2 | 1 | 2340 | 269.7 | 5.39  | 5.53 | 2 | 1 |
| TRUE | Master Protein | A0A4X1W661 | CSD_1 domain-containing protein OS=Sus scrofa OX=9823 GN=YBX1 PE=4 SV=1                      | 19 | 2 | 2 | 2 | 324  | 35.9  | 9.88  | 5.52 | 2 | 1 |
| TRUE | Master Protein | F1S564     | RNA 3'-terminal phosphate cyclase OS=Sus scrofa OX=9823 GN=RTCA PE=1 SV=3                    | 5  | 1 | 1 | 1 | 366  | 39.2  | 8.09  | 5.51 | 1 | 1 |
| TRUE | Master Protein | A0A4X1VUZ7 | Glutathione peroxidase OS=Sus scrofa OX=9823 GN=GPX4 PE=3 SV=1                               | 15 | 2 | 2 | 2 | 197  | 22.2  | 8.31  | 5.49 | 2 | 1 |
| TRUE | Master Protein | F1RQ90     | RNA-binding motif protein, X chromosome isoform 1 OS=Sus scrofa OX=9823 GN=RBMX PE=1 SV=1    | 6  | 2 | 2 | 2 | 390  | 42.2  | 10.05 | 5.48 | 2 | 1 |
| TRUE | Master Protein | Q9GL64     | Transcription factor A (Fragment) OS=Sus scrofa OX=9823 GN=Tfam PE=2 SV=1                    | 7  | 1 | 2 | 1 | 149  | 17.9  | 9.32  | 5.48 | 1 | 1 |

|      |                |             |                                                                                                       |    |   |   |   |      |       |       |      |   |   |
|------|----------------|-------------|-------------------------------------------------------------------------------------------------------|----|---|---|---|------|-------|-------|------|---|---|
| TRUE | Master Protein | A1XQU9      | 40S ribosomal protein S20 OS=Sus scrofa OX=9823 GN=RPS20 PE=1 SV=1                                    | 15 | 2 | 2 | 2 | 119  | 13.3  | 9.94  | 5.42 | 2 | 1 |
| TRUE | Master Protein | A0A287A V76 | BAG domain-containing protein OS=Sus scrofa OX=9823 GN=BAG2 PE=1 SV=1                                 | 13 | 2 | 2 | 2 | 210  | 23.6  | 6.38  | 5.34 | 2 | 1 |
| TRUE | Master Protein | A0A4X1T DZ5 | Alpha(B)-crystallin OS=Sus scrofa OX=9823 GN=CRYAB PE=3 SV=1                                          | 9  | 2 | 2 | 2 | 237  | 27.6  | 9.73  | 5.28 | 2 | 1 |
| TRUE | Master Protein | A0A5G2Q DJ2 | Polyubiquitin-C OS=Sus scrofa OX=9823 GN=UBC PE=4 SV=1                                                | 37 | 2 | 2 | 2 | 837  | 94.1  | 7.68  | 5.23 | 2 | 1 |
| TRUE | Master Protein | A0A480P H82 | HIV Tat-specific factor 1 OS=Sus scrofa OX=9823 PE=3 SV=1                                             | 4  | 1 | 1 | 1 | 788  | 87.2  | 4.45  | 5.19 | 1 | 1 |
| TRUE | Master Protein | A0A480K S67 | FACT complex subunit SSRP1 OS=Sus scrofa OX=9823 PE=3 SV=1                                            | 5  | 2 | 2 | 2 | 655  | 75.2  | 7.53  | 5.17 | 2 | 1 |
| TRUE | Master Protein | Q2YGT9      | 60S ribosomal protein L6 OS=Sus scrofa OX=9823 GN=RPL6 PE=1 SV=3                                      | 9  | 2 | 2 | 2 | 284  | 32.2  | 10.73 | 5.14 | 2 | 1 |
| TRUE | Master Protein | A0A480IZ Z5 | Transcription activator BRG1 isoform X6 OS=Sus scrofa OX=9823 PE=3 SV=1                               | 2  | 2 | 2 | 2 | 1617 | 181.6 | 8.07  | 5.14 | 2 | 1 |
| TRUE | Master Protein | A0A287B KP9 | von Willebrand factor A domain-containing protein 1 isoform 1 OS=Sus scrofa OX=9823 GN=VWA1 PE=1 SV=1 | 6  | 2 | 2 | 2 | 452  | 47.7  | 10.07 | 5.11 | 2 | 1 |
| TRUE | Master Protein | A0A2C9F 345 | U1 small nuclear ribonucleoprotein A OS=Sus scrofa OX=9823 GN=SNRPA PE=3 SV=1                         | 10 | 2 | 2 | 2 | 281  | 31.2  | 9.83  | 5    | 2 | 1 |
| TRUE | Master Protein | F1S3F6      | Ceh-10 homeodomain-containing homolog OS=Sus scrofa OX=9823 GN=VSX2 PE=1 SV=3                         | 4  | 1 | 2 | 1 | 361  | 39.3  | 6.96  | 4.93 | 1 | 1 |
| TRUE | Master Protein | A0A287B P50 | PITH domain-containing protein OS=Sus scrofa OX=9823 GN=TXNL1 PE=1 SV=1                               | 8  | 1 | 1 | 1 | 285  | 31.9  | 4.89  | 4.91 | 1 | 1 |
| TRUE | Master Protein | I3LH70      | LAM_G_DOMAIN domain-containing protein OS=Sus scrofa OX=9823 GN=COL18A1 PE=1 SV=3                     | 1  | 2 | 2 | 2 | 1613 | 162.8 | 8.28  | 4.9  | 2 | 1 |
| TRUE | Master Protein | A0A480V KU0 | Laminin subunit alpha-5 isoform X1 OS=Sus scrofa OX=9823 PE=4 SV=1                                    | 1  | 2 | 2 | 2 | 3484 | 374.4 | 6.81  | 4.89 | 2 | 1 |
| TRUE | Master Protein | F1DFL7      | Aminopeptidase OS=Sus scrofa OX=9823 PE=2 SV=1                                                        | 3  | 2 | 2 | 2 | 963  | 108.8 | 5.25  | 4.78 | 2 | 1 |
| TRUE | Master Protein | A0A287A KP9 | RRM domain-containing protein OS=Sus scrofa OX=9823 GN=RALY PE=1 SV=1                                 | 5  | 2 | 2 | 2 | 365  | 37.9  | 9.28  | 4.78 | 2 | 1 |
| TRUE | Master Protein | A0A481D HP5 | 40S ribosomal protein S25 (Fragment) OS=Sus scrofa OX=9823 PE=3 SV=1                                  | 14 | 2 | 2 | 2 | 138  | 14.9  | 10.11 | 4.75 | 2 | 1 |
| TRUE | Master Protein | F1SFF4      | RNA transcription, translation and transport factor protein OS=Sus scrofa OX=9823 GN=RTRAF PE=1 SV=1  | 7  | 1 | 1 | 1 | 244  | 28    | 6.65  | 4.75 | 1 | 1 |
| TRUE | Master Protein | A0A480J4 Z3 | Ubiquitin carboxyl-terminal hydrolase OS=Sus scrofa OX=9823 PE=3 SV=1                                 | 3  | 2 | 2 | 2 | 835  | 93.4  | 5.1   | 4.73 | 2 | 1 |
| TRUE | Master Protein | A0A4X1T 8H6 | Phosphodiesterase OS=Sus scrofa OX=9823 PE=3 SV=1                                                     | 2  | 2 | 2 | 2 | 862  | 99.6  | 5.77  | 4.67 | 2 | 1 |
| TRUE | Master Protein | A0A4X1U VB3 | Protein lin-7 homolog OS=Sus scrofa OX=9823 GN=LIN7A PE=3 SV=1                                        | 8  | 2 | 2 | 2 | 233  | 26    | 8.72  | 4.66 | 2 | 1 |
| TRUE | Master Protein | A0A4X1V R00 | Dynamin-1-like protein OS=Sus scrofa OX=9823 GN=DNM1L PE=3 SV=1                                       | 4  | 2 | 2 | 2 | 725  | 80.5  | 6.71  | 4.63 | 2 | 1 |

|      |                |            |                                                                                                                               |    |   |   |   |      |       |       |      |   |   |
|------|----------------|------------|-------------------------------------------------------------------------------------------------------------------------------|----|---|---|---|------|-------|-------|------|---|---|
| TRUE | Master Protein | A0A480VGI2 | DNA helicase OS=Sus scrofa OX=9823 PE=3 SV=1                                                                                  | 2  | 2 | 2 | 2 | 1220 | 138.9 | 7.06  | 4.6  | 2 | 1 |
| TRUE | Master Protein | I3LSE4     | Protein kinase domain-containing protein OS=Sus scrofa OX=9823 GN=CAMKV PE=1 SV=3                                             | 5  | 2 | 2 | 2 | 559  | 60.5  | 6.49  | 4.56 | 2 | 1 |
| TRUE | Master Protein | A0A287AVQ1 | RNA helicase OS=Sus scrofa OX=9823 GN=DDX3X PE=1 SV=1                                                                         | 3  | 2 | 2 | 1 | 659  | 72.9  | 7.59  | 4.56 | 2 | 1 |
| TRUE | Master Protein | A0A480TW29 | Serine/arginine-rich splicing factor 2 (Fragment) OS=Sus scrofa OX=9823 PE=3 SV=1                                             | 8  | 2 | 2 | 2 | 211  | 24.4  | 11.97 | 4.5  | 2 | 1 |
| TRUE | Master Protein | I3LQX0     | SUN domain-containing protein OS=Sus scrofa OX=9823 GN=SUN1 PE=1 SV=3                                                         | 3  | 2 | 2 | 2 | 717  | 77.9  | 7.05  | 4.47 | 2 | 1 |
| TRUE | Master Protein | A0A5G2RAE1 | RNA helicase OS=Sus scrofa OX=9823 GN=DDX46 PE=1 SV=1                                                                         | 2  | 2 | 2 | 2 | 1032 | 117.3 | 9.29  | 4.46 | 2 | 1 |
| TRUE | Master Protein | A0A480TAZ5 | SWI/SNF-related matrix-associated actin-dependent regulator of chromatin subfamily A member 5 OS=Sus scrofa OX=9823 PE=3 SV=1 | 2  | 2 | 2 | 2 | 1052 | 121.8 | 8.31  | 4.46 | 2 | 1 |
| TRUE | Master Protein | A0A287BCK8 | Fibroblast growth factor OS=Sus scrofa OX=9823 GN=FGF2 PE=1 SV=1                                                              | 6  | 2 | 2 | 2 | 316  | 33.6  | 11.4  | 4.4  | 2 | 1 |
| TRUE | Master Protein | A0A480QSC0 | Amino acid transporter OS=Sus scrofa OX=9823 PE=3 SV=1                                                                        | 3  | 1 | 1 | 1 | 447  | 49.6  | 9.54  | 4.38 | 1 | 1 |
| TRUE | Master Protein | A0A5G2R4Z1 | Sorting nexin-3 OS=Sus scrofa OX=9823 GN=SNX3 PE=1 SV=1                                                                       | 13 | 2 | 2 | 2 | 162  | 18.8  | 8.66  | 4.27 | 2 | 1 |
| TRUE | Master Protein | A0A287AKE5 | Protein lin-7 homolog OS=Sus scrofa OX=9823 GN=LIN7C PE=1 SV=2                                                                | 10 | 2 | 2 | 2 | 199  | 22    | 7.85  | 4.23 | 2 | 1 |
| TRUE | Master Protein | A0A5G2QQC6 | Mediator of DNA damage checkpoint protein 1 OS=Sus scrofa OX=9823 GN=MDC1 PE=4 SV=1                                           | 1  | 1 | 1 | 1 | 2047 | 218.5 | 5.45  | 4.23 | 1 | 1 |
| TRUE | Master Protein | A0A480TIY8 | General transcription factor 3C polypeptide 5 isoform 2 OS=Sus scrofa OX=9823 PE=4 SV=1                                       | 4  | 2 | 2 | 2 | 513  | 58.7  | 7.03  | 4.2  | 2 | 1 |
| TRUE | Master Protein | A0A4X1UA50 | Nucleoporin_C domain-containing protein OS=Sus scrofa OX=9823 GN=NUP133 PE=3 SV=1                                             | 2  | 1 | 1 | 1 | 1141 | 127.3 | 5.21  | 4.18 | 1 | 1 |
| TRUE | Master Protein | A0A287AGK7 | DNA helicase OS=Sus scrofa OX=9823 GN=CHD2 PE=4 SV=1                                                                          | 1  | 2 | 2 | 2 | 1781 | 205.5 | 7.53  | 4.16 | 2 | 1 |
| TRUE | Master Protein | A0A4X1UFA1 | Ribosomal protein L19 OS=Sus scrofa OX=9823 PE=3 SV=1                                                                         | 14 | 2 | 2 | 2 | 181  | 21.4  | 11.84 | 4.15 | 2 | 1 |
| TRUE | Master Protein | A0A287BOT7 | Chromobox protein homolog 3 isoform X1 OS=Sus scrofa OX=9823 GN=CBX3 PE=1 SV=1                                                | 14 | 2 | 2 | 2 | 183  | 20.8  | 5.33  | 4.14 | 2 | 1 |
| TRUE | Master Protein | A0A4X1WBN0 | IF rod domain-containing protein OS=Sus scrofa OX=9823 PE=3 SV=1                                                              | 3  | 2 | 2 | 1 | 565  | 60.5  | 8.22  | 4.11 | 2 | 1 |
| TRUE | Master Protein | F1RQ91     | 40S ribosomal protein S4 OS=Sus scrofa OX=9823 GN=RPS4X PE=1 SV=3                                                             | 5  | 1 | 1 | 1 | 242  | 27.6  | 10.08 | 4.06 | 1 | 1 |
| TRUE | Master Protein | A0A480N4X7 | 40S ribosomal protein S26 OS=Sus scrofa OX=9823 PE=3 SV=1                                                                     | 14 | 1 | 1 | 1 | 107  | 12.2  | 10.83 | 3.95 | 1 | 1 |
| TRUE | Master Protein | A0A287A4C0 | DUF3504 domain-containing protein OS=Sus scrofa OX=9823 GN=QRICH1 PE=4 SV=1                                                   | 2  | 1 | 1 | 1 | 779  | 86.8  | 5.95  | 3.94 | 1 | 1 |
| TRUE | Master Protein | A0A4X1TH39 | DZF domain-containing protein OS=Sus scrofa OX=9823 GN=ZFR PE=4 SV=1                                                          | 2  | 1 | 1 | 1 | 1003 | 109.4 | 9.23  | 3.89 | 1 | 1 |

|      |                |            |                                                                                                              |    |   |   |   |      |       |       |      |   |   |
|------|----------------|------------|--------------------------------------------------------------------------------------------------------------|----|---|---|---|------|-------|-------|------|---|---|
| TRUE | Master Protein | A0A5G2QJ52 | 14_3_3 domain-containing protein OS=Sus scrofa OX=9823 GN=CRK PE=1 SV=1                                      | 5  | 1 | 1 | 1 | 266  | 30.5  | 6.43  | 3.72 | 1 | 1 |
| TRUE | Master Protein | D3K5K3     | DNA mismatch repair protein OS=Sus scrofa OX=9823 GN=MSH2 PE=2 SV=1                                          | 2  | 1 | 1 | 1 | 934  | 104.5 | 5.64  | 3.7  | 1 | 1 |
| TRUE | Master Protein | A0A287AC97 | MICOS complex subunit MIC19 isoform 2 OS=Sus scrofa OX=9823 GN=CHCHD3 PE=1 SV=1                              | 6  | 1 | 1 | 1 | 235  | 27.2  | 8.19  | 3.7  | 1 | 1 |
| TRUE | Master Protein | A0A480KG54 | Ciliary neurotrophic factor receptor subunit alpha OS=Sus scrofa OX=9823 PE=3 SV=1                           | 6  | 1 | 1 | 1 | 372  | 40.9  | 6.95  | 3.68 | 1 | 1 |
| TRUE | Master Protein | F1RLT6     | Guanine nucleotide-binding protein G(Z) subunit alpha OS=Sus scrofa OX=9823 GN=GNAZ PE=1 SV=1                | 4  | 1 | 1 | 1 | 355  | 40.7  | 7.61  | 3.65 | 1 | 1 |
| TRUE | Master Protein | Q29375     | 60S ribosomal protein L7a (Fragment) OS=Sus scrofa OX=9823 GN=RPL7A PE=2 SV=1                                | 11 | 1 | 1 | 1 | 132  | 14.6  | 10.14 | 3.56 | 1 | 1 |
| TRUE | Master Protein | A0A4X1TVR0 | DNA-directed RNA polymerase subunit beta OS=Sus scrofa OX=9823 PE=3 SV=1                                     | 2  | 1 | 1 | 1 | 1196 | 135.9 | 7.88  | 3.54 | 1 | 1 |
| TRUE | Master Protein | A0A480L1A5 | Regulator of microtubule dynamics protein 3 isoform 1 OS=Sus scrofa OX=9823 PE=4 SV=1                        | 3  | 1 | 1 | 1 | 496  | 54.5  | 5.47  | 3.53 | 1 | 1 |
| TRUE | Master Protein | A0A5G2QJ8  | Importin subunit alpha OS=Sus scrofa OX=9823 GN=KPNA1 PE=1 SV=1                                              | 3  | 1 | 1 | 1 | 531  | 59.4  | 4.97  | 3.47 | 1 | 1 |
| TRUE | Master Protein | A0A480V6Z4 | ATP synthase subunit alpha, mitochondrial isoform a OS=Sus scrofa OX=9823 PE=3 SV=1                          | 5  | 1 | 1 | 1 | 323  | 34.6  | 9.44  | 3.46 | 1 | 1 |
| TRUE | Master Protein | F1SQA9     | GATOR complex protein SEC13 OS=Sus scrofa OX=9823 GN=SEC13 PE=1 SV=4                                         | 5  | 1 | 1 | 1 | 333  | 36.7  | 5.48  | 3.44 | 1 | 1 |
| TRUE | Master Protein | F1SUT1     | Pleckstrin homology domain-containing family B member 1 isoform a OS=Sus scrofa OX=9823 GN=PLEKHB1 PE=1 SV=3 | 10 | 1 | 1 | 1 | 224  | 25.4  | 8.46  | 3.38 | 1 | 1 |
| TRUE | Master Protein | A0A5G2Q7N6 | 60S ribosomal protein L11 OS=Sus scrofa OX=9823 GN=RPL11 PE=3 SV=1                                           | 7  | 1 | 1 | 1 | 192  | 22    | 9.72  | 3.24 | 1 | 1 |
| TRUE | Master Protein | A0A287AHC5 | Guanine nucleotide-binding protein subunit gamma OS=Sus scrofa OX=9823 PE=3 SV=1                             | 21 | 1 | 1 | 1 | 68   | 7.5   | 8.51  | 3.24 | 1 | 1 |
| TRUE | Master Protein | P01965     | Hemoglobin subunit alpha OS=Sus scrofa OX=9823 GN=HBA PE=1 SV=1                                              | 11 | 1 | 1 | 1 | 141  | 15    | 8.7   | 3.19 | 1 | 1 |
| TRUE | Master Protein | F2YI04     | Fas apoptosis inhibitory molecule 1 OS=Sus scrofa OX=9823 GN=FAIM1 PE=2 SV=1                                 | 8  | 1 | 1 | 1 | 200  | 22.5  | 5.02  | 3.18 | 1 | 1 |
| TRUE | Master Protein | A0A287B8N1 | ATP-dependent 6-phosphofructokinase OS=Sus scrofa OX=9823 GN=PFKM PE=1 SV=1                                  | 3  | 1 | 1 | 1 | 809  | 88.9  | 8.34  | 3.18 | 1 | 1 |
| TRUE | Master Protein | A0A4X1W398 | AAA domain-containing protein OS=Sus scrofa OX=9823 GN=LOC100525876 PE=3 SV=1                                | 2  | 1 | 1 | 1 | 493  | 56.3  | 9.5   | 3.15 | 1 | 1 |
| TRUE | Master Protein | A0A480VOY7 | Metastasis-associated protein MTA1 isoform MTA1s OS=Sus scrofa OX=9823 PE=4 SV=1                             | 2  | 1 | 1 | 1 | 429  | 48.7  | 5.5   | 3.14 | 1 | 1 |
| TRUE | Master Protein | A0A480TKG0 | Nuclear pore complex protein Nup155 isoform 1 OS=Sus scrofa OX=9823 PE=3 SV=1                                | 1  | 1 | 1 | 1 | 1392 | 155.2 | 6.3   | 3.11 | 1 | 1 |
| TRUE | Master Protein | I3LK59     | 2-phospho-D-glycerate hydro-lyase OS=Sus scrofa OX=9823 GN=ENO1 PE=1 SV=3                                    | 4  | 1 | 1 | 1 | 434  | 47.1  | 7.14  | 3.1  | 1 | 1 |
| TRUE | Master Protein | A0A4X1U612 | ANK_REP_REGION domain-containing protein OS=Sus scrofa OX=9823 GN=ANKRD10 PE=4 SV=1                          | 14 | 1 | 1 | 1 | 161  | 17    | 6.77  | 3.07 | 1 | 1 |

|      |                |            |                                                                                                      |    |   |   |   |      |       |       |      |   |   |
|------|----------------|------------|------------------------------------------------------------------------------------------------------|----|---|---|---|------|-------|-------|------|---|---|
| TRUE | Master Protein | A0A4X1T7A1 | RRM domain-containing protein OS=Sus scrofa OX=9823 GN=MSI1 PE=3 SV=1                                | 5  | 1 | 1 | 1 | 311  | 33.5  | 9.17  | 3.02 | 1 | 1 |
| TRUE | Master Protein | F2Z594     | High mobility group protein B1 OS=Sus scrofa OX=9823 GN=HMGB1 PE=1 SV=3                              | 5  | 1 | 1 | 1 | 220  | 25.3  | 9.95  | 3.01 | 1 | 1 |
| TRUE | Master Protein | A0A481B6W1 | Peptidyl-prolyl cis-trans isomerase OS=Sus scrofa OX=9823 PE=3 SV=1                                  | 3  | 1 | 1 | 1 | 492  | 57.2  | 5.94  | 3.01 | 1 | 1 |
| TRUE | Master Protein | A0A4X1U3M8 | Mitochondrial fission factor OS=Sus scrofa OX=9823 GN=MFF PE=3 SV=1                                  | 6  | 1 | 1 | 1 | 237  | 27    | 6.62  | 2.98 | 1 | 1 |
| TRUE | Master Protein | A0A480LR40 | Tricarboxylate transport protein, mitochondrial isoform a (Fragment) OS=Sus scrofa OX=9823 PE=3 SV=1 | 3  | 1 | 1 | 1 | 395  | 42.8  | 10.46 | 2.98 | 1 | 1 |
| TRUE | Master Protein | A0A5G2R2K0 | RNA helicase aquarius OS=Sus scrofa OX=9823 GN=AQR PE=1 SV=1                                         | 1  | 1 | 1 | 1 | 1485 | 170.7 | 6.4   | 2.95 | 1 | 1 |
| TRUE | Master Protein | A0A4X1UDF8 | 60S ribosomal protein L32 OS=Sus scrofa OX=9823 GN=RPL32 PE=3 SV=1                                   | 7  | 1 | 1 | 1 | 149  | 17.5  | 11.05 | 2.94 | 1 | 1 |
| TRUE | Master Protein | A0A480PKL9 | Prospero homeobox protein 1 isoform X2 OS=Sus scrofa OX=9823 PE=4 SV=1                               | 3  | 1 | 1 | 1 | 607  | 67.6  | 7.83  | 2.92 | 1 | 1 |
| TRUE | Master Protein | A0A481D0A9 | Biglycan OS=Sus scrofa OX=9823 PE=3 SV=1                                                             | 3  | 1 | 1 | 1 | 488  | 53.3  | 9.06  | 2.88 | 1 | 1 |
| TRUE | Master Protein | A0A4X1VZ98 | V-type proton ATPase subunit F OS=Sus scrofa OX=9823 PE=3 SV=1                                       | 10 | 1 | 1 | 1 | 118  | 13.2  | 5.3   | 2.88 | 1 | 1 |
| TRUE | Master Protein | Q19PY3     | RNA-splicing ligase RtcB homolog OS=Sus scrofa OX=9823 GN=RTCB PE=2 SV=1                             | 2  | 1 | 1 | 1 | 505  | 55.2  | 7.23  | 2.88 | 1 | 1 |
| TRUE | Master Protein | F1RWX5     | ATPase WRNIP1 isoform 1 OS=Sus scrofa OX=9823 GN=WRNIP1 PE=1 SV=2                                    | 2  | 1 | 1 | 1 | 638  | 69    | 6.34  | 2.88 | 1 | 1 |
| TRUE | Master Protein | A0A4X1UUF9 | Nucleolar protein 10 OS=Sus scrofa OX=9823 GN=NOP10 PE=3 SV=1                                        | 20 | 1 | 1 | 1 | 64   | 7.6   | 9.99  | 2.83 | 1 | 1 |
| TRUE | Master Protein | A0A480N9L6 | Non-specific serine/threonine protein kinase OS=Sus scrofa OX=9823 PE=4 SV=1                         | 5  | 1 | 1 | 1 | 1083 | 115.3 | 8.57  | 2.78 | 1 | 1 |
| TRUE | Master Protein | A0A4X1V3M7 | Small nuclear ribonucleoprotein E OS=Sus scrofa OX=9823 GN=SNRPE PE=3 SV=1                           | 12 | 1 | 1 | 1 | 92   | 10.8  | 9.44  | 2.77 | 1 | 1 |
| TRUE | Master Protein | A0A287A5P3 | 116 kDa U5 small nuclear ribonucleoprotein component OS=Sus scrofa OX=9823 GN=EF-TUD2 PE=1 SV=2      | 1  | 1 | 1 | 1 | 937  | 105.4 | 5.22  | 2.76 | 1 | 1 |
| TRUE | Master Protein | A0A4X1VSZ6 | SUN domain-containing protein OS=Sus scrofa OX=9823 GN=SUN2 PE=4 SV=1                                | 2  | 1 | 1 | 1 | 713  | 79.7  | 7.02  | 2.75 | 1 | 1 |
| TRUE | Master Protein | A0A480N4J2 | Histone deacetylase OS=Sus scrofa OX=9823 PE=3 SV=1                                                  | 3  | 1 | 1 | 1 | 359  | 40.7  | 7.46  | 2.74 | 1 | 1 |
| TRUE | Master Protein | A0A4X1SK8  | 40S ribosomal protein S24 OS=Sus scrofa OX=9823 GN=RPS24 PE=1 SV=1                                   | 11 | 1 | 1 | 1 | 132  | 15.3  | 10.92 | 2.73 | 1 | 1 |
| TRUE | Master Protein | I3LI59     | RNA-binding protein 8A OS=Sus scrofa OX=9823 GN=RBM8A PE=1 SV=2                                      | 6  | 1 | 1 | 1 | 174  | 19.9  | 5.72  | 2.71 | 1 | 1 |
| TRUE | Master Protein | A0A480VPD1 | 26S proteasome regulatory subunit 6A (Fragment) OS=Sus scrofa OX=9823 PE=3 SV=1                      | 4  | 1 | 1 | 1 | 446  | 50.1  | 5.29  | 2.7  | 1 | 1 |
| TRUE | Master Protein | A0A4X1TM87 | PKD domain-containing protein OS=Sus scrofa OX=9823 PE=3 SV=1                                        | 4  | 1 | 1 | 1 | 1077 | 119.6 | 7.28  | 2.7  | 1 | 1 |

|      |                |            |                                                                                             |    |   |   |   |      |       |       |      |   |   |
|------|----------------|------------|---------------------------------------------------------------------------------------------|----|---|---|---|------|-------|-------|------|---|---|
| TRUE | Master Protein | A0A4X1U78  | tRNA-binding domain-containing protein OS=Sus scrofa OX=9823 GN=AIMP1 PE=4 SV=1             | 4  | 1 | 1 | 1 | 335  | 37.5  | 6.8   | 2.7  | 1 | 1 |
| TRUE | Master Protein | A0A4X1VUM6 | Cold-inducible RNA-binding protein OS=Sus scrofa OX=9823 GN=DAZAP1 PE=4 SV=1                | 5  | 1 | 1 | 1 | 231  | 24.9  | 7.97  | 2.66 | 1 | 1 |
| TRUE | Master Protein | I3LBT8     | Small nuclear ribonucleoprotein-associated protein OS=Sus scrofa OX=9823 GN=SNRPN PE=3 SV=3 | 4  | 1 | 1 | 1 | 250  | 26.1  | 10.7  | 2.64 | 1 | 1 |
| TRUE | Master Protein | A0A287ADF7 | Prohibitin OS=Sus scrofa OX=9823 GN=PHB PE=1 SV=1                                           | 5  | 1 | 1 | 1 | 256  | 28.3  | 6.02  | 2.55 | 1 | 1 |
| TRUE | Master Protein | A0A4X1TF03 | C2 domain-containing protein OS=Sus scrofa OX=9823 PE=4 SV=1                                | 3  | 1 | 1 | 1 | 684  | 73.4  | 6.7   | 2.55 | 1 | 1 |
| TRUE | Master Protein | F2Z4Y8     | 40S ribosomal protein S11 OS=Sus scrofa OX=9823 GN=RPS11 PE=1 SV=1                          | 7  | 1 | 1 | 1 | 158  | 18.4  | 10.3  | 2.54 | 1 | 1 |
| TRUE | Master Protein | A0A4X1TUV5 | U2 snRNP auxiliary factor large subunit OS=Sus scrofa OX=9823 GN=U2AF2 PE=3 SV=1            | 2  | 1 | 1 | 1 | 456  | 51.4  | 8.82  | 2.54 | 1 | 1 |
| TRUE | Master Protein | A0A480JP88 | E3 ubiquitin-protein ligase OS=Sus scrofa OX=9823 PE=4 SV=1                                 | 1  | 1 | 1 | 1 | 929  | 105.6 | 6.14  | 2.53 | 1 | 1 |
| TRUE | Master Protein | A0A4X1VZZ5 | S_100 domain-containing protein OS=Sus scrofa OX=9823 GN=S100A14 PE=4 SV=1                  | 14 | 1 | 1 | 1 | 104  | 11.4  | 4.78  | 2.53 | 1 | 1 |
| TRUE | Master Protein | A0A480YQ07 | Cell cycle and apoptosis regulator protein 2 OS=Sus scrofa OX=9823 PE=4 SV=1                | 2  | 1 | 1 | 1 | 759  | 83.4  | 5.38  | 2.53 | 1 | 1 |
| TRUE | Master Protein | A0A5S8KL32 | Protein-serine/threonine phosphatase OS=Sus scrofa OX=9823 GN=PPP1CB PE=1 SV=1              | 5  | 1 | 1 | 1 | 303  | 34.4  | 6.4   | 2.52 | 1 | 1 |
| TRUE | Master Protein | A0A4X1SET4 | RRM domain-containing protein OS=Sus scrofa OX=9823 GN=NIFK PE=4 SV=1                       | 4  | 1 | 1 | 1 | 294  | 34    | 10.15 | 2.52 | 1 | 1 |
| TRUE | Master Protein | A0A4X1TVZ8 | Nuclear cap-binding protein subunit 2 OS=Sus scrofa OX=9823 GN=NCBP2 PE=3 SV=1              | 7  | 1 | 1 | 1 | 156  | 18    | 8.21  | 2.51 | 1 | 1 |
| TRUE | Master Protein | A0A286ZQJ3 | SMP_C2CD2L domain-containing protein OS=Sus scrofa OX=9823 GN=C2CD2L PE=1 SV=1              | 1  | 1 | 1 | 1 | 669  | 71.7  | 8.32  | 2.51 | 1 | 1 |
| TRUE | Master Protein | A0A5G2QY32 | RPOLD domain-containing protein OS=Sus scrofa OX=9823 GN=POLR2C PE=1 SV=1                   | 7  | 1 | 1 | 1 | 275  | 31.3  | 4.96  | 2.5  | 1 | 1 |
| TRUE | Master Protein | A0A287A8V1 | RNA helicase OS=Sus scrofa OX=9823 GN=EIF4A1 PE=1 SV=1                                      | 3  | 1 | 1 | 1 | 390  | 44.5  | 5.57  | 2.48 | 1 | 1 |
| TRUE | Master Protein | A0A480U187 | H/ACA ribonucleoprotein complex subunit 4 isoform 1 OS=Sus scrofa OX=9823 PE=3 SV=1         | 2  | 1 | 1 | 1 | 521  | 58.1  | 9.47  | 2.48 | 1 | 1 |
| TRUE | Master Protein | A0A287APR1 | 60S ribosomal protein L18a OS=Sus scrofa OX=9823 GN=RPL18A PE=1 SV=1                        | 6  | 1 | 1 | 1 | 224  | 26    | 10.92 | 2.48 | 1 | 1 |
| TRUE | Master Protein | I3LNY6     | IF rod domain-containing protein OS=Sus scrofa OX=9823 GN=NES PE=1 SV=2                     | 1  | 1 | 1 | 1 | 1699 | 184.7 | 4.36  | 2.47 | 1 | 1 |
| TRUE | Master Protein | A0A480TWW0 | Signal transducer and activator of transcription OS=Sus scrofa OX=9823 PE=3 SV=1            | 1  | 1 | 1 | 1 | 787  | 89.9  | 6.11  | 2.46 | 1 | 1 |
| TRUE | Master Protein | A0A4X1VLL6 | BTB domain-containing protein OS=Sus scrofa OX=9823 PE=4 SV=1                               | 2  | 1 | 1 | 1 | 490  | 53.6  | 9.16  | 2.46 | 1 | 1 |
| TRUE | Master Protein | A0A5S6HGD8 | Non-histone chromosomal protein HMG-17 OS=Sus scrofa OX=9823 GN=HMGN2 PE=3 SV=1             | 16 | 1 | 1 | 1 | 90   | 9.3   | 9.8   | 2.44 | 1 | 1 |



|      |                |                |                                                                                                                  |    |   |   |   |      |       |       |      |   |   |
|------|----------------|----------------|------------------------------------------------------------------------------------------------------------------|----|---|---|---|------|-------|-------|------|---|---|
| TRUE | Master Protein | A0A0U2V<br>PN4 | Estrogen related receptor gamma 1 OS=Sus scrofa OX=9823 GN=ESRRG1 PE=2 SV=1                                      | 5  | 1 | 1 | 1 | 458  | 51.2  | 6.48  | 2.44 | 1 | 1 |
| TRUE | Master Protein | A0A287A<br>WS4 | 60S ribosomal protein L27a OS=Sus scrofa OX=9823 GN=RPL27A PE=1 SV=2                                             | 7  | 1 | 1 | 1 | 148  | 16.6  | 11.12 | 2.43 | 1 | 1 |
| TRUE | Master Protein | A0A480N<br>BM2 | Splicing factor 3B subunit 2 OS=Sus scrofa OX=9823 PE=4 SV=1                                                     | 1  | 1 | 1 | 1 | 732  | 82.5  | 5.69  | 2.43 | 1 | 1 |
| TRUE | Master Protein | A0A4X1T<br>XJ8 | 60S ribosomal protein L30 OS=Sus scrofa OX=9823 GN=RPL30 PE=1 SV=1                                               | 10 | 1 | 1 | 1 | 115  | 12.8  | 9.63  | 2.42 | 1 | 1 |
| TRUE | Master Protein | A0A0B8R<br>SW3 | Glyoxylate reductase 1 homolog OS=Sus scrofa domesticus OX=9825 GN=GLYR1 PE=3 SV=1                               | 2  | 1 | 1 | 1 | 547  | 59.8  | 9.26  | 2.41 | 1 | 1 |
| TRUE | Master Protein | A0A287A<br>TC4 | PRP6 homolog OS=Sus scrofa OX=9823 GN=PRPF6 PE=1 SV=1                                                            | 1  | 1 | 1 | 1 | 1150 | 128.1 | 9.09  | 2.4  | 1 | 1 |
| TRUE | Master Protein | A0A0B8R<br>TA7 | RNA binding motif protein 25 OS=Sus scrofa domesticus OX=9825 GN=RBM25 PE=4 SV=1                                 | 2  | 1 | 1 | 1 | 843  | 100.1 | 6.32  | 2.37 | 1 | 1 |
| TRUE | Master Protein | A0A287A<br>X73 | KASH domain-containing protein OS=Sus scrofa OX=9823 GN=SYNE3 PE=1 SV=1                                          | 1  | 1 | 1 | 1 | 975  | 111.7 | 6.57  | 2.37 | 1 | 1 |
| TRUE | Master Protein | A0A4X1T<br>HZ5 | Ig-like domain-containing protein OS=Sus scrofa OX=9823 PE=4 SV=1                                                | 16 | 1 | 1 | 1 | 112  | 11.9  | 8.29  | 2.37 | 1 | 1 |
| TRUE | Master Protein | A0A4X1U<br>CP4 | Homeobox protein NK-2 homolog E OS=Sus scrofa OX=9823 GN=NKX2-5 PE=3 SV=1                                        | 8  | 1 | 1 | 1 | 323  | 34.6  | 9.29  | 2.37 | 1 | 1 |
| TRUE | Master Protein | A0A4X1V<br>HE8 | Glutamate dehydrogenase (NAD(P)(+)) OS=Sus scrofa OX=9823 GN=GLUD1 PE=3 SV=1                                     | 2  | 1 | 1 | 1 | 558  | 61.3  | 7.96  | 2.36 | 1 | 1 |
| TRUE | Master Protein | A0A287A<br>EM2 | 40S ribosomal protein S5 OS=Sus scrofa OX=9823 GN=RPS5 PE=1 SV=1                                                 | 7  | 1 | 1 | 1 | 229  | 25.3  | 9.63  | 2.36 | 1 | 1 |
| TRUE | Master Protein | A0A4X1SZ<br>J9 | Peptidylprolyl isomerase OS=Sus scrofa OX=9823 GN=FKBP5 PE=4 SV=1                                                | 2  | 1 | 1 | 1 | 465  | 52.2  | 5.69  | 2.36 | 1 | 1 |
| TRUE | Master Protein | A0A287BJ<br>K8 | MTTase N-terminal domain-containing protein OS=Sus scrofa OX=9823 GN=CDKAL1 PE=4 SV=1                            | 5  | 1 | 1 | 1 | 550  | 61.7  | 8.31  | 2.35 | 1 | 1 |
| TRUE | Master Protein | I3LP32         | Pre-mRNA-splicing factor 38A OS=Sus scrofa OX=9823 GN=PRPF38A PE=3 SV=2                                          | 4  | 1 | 1 | 1 | 312  | 37.5  | 9.96  | 2.35 | 1 | 1 |
| TRUE | Master Protein | A0A4X1V<br>CR4 | Creatine kinase OS=Sus scrofa OX=9823 GN=CKMT1A PE=3 SV=1                                                        | 4  | 1 | 1 | 1 | 342  | 38.5  | 8.03  | 2.3  | 1 | 1 |
| TRUE | Master Protein | A0A4X1U<br>OQ7 | RuvB-like helicase OS=Sus scrofa OX=9823 GN=RUVBL1 PE=3 SV=1                                                     | 2  | 1 | 1 | 1 | 456  | 50.2  | 6.42  | 2.29 | 1 | 1 |
| TRUE | Master Protein | Q9GMB0         | Dolichyl-diphosphooligosaccharide--protein glycosyltransferase subunit 1 OS=Sus scrofa OX=9823 GN=RPN1 PE=1 SV=1 | 2  | 1 | 1 | 1 | 608  | 68.7  | 6.55  | 2.27 | 1 | 1 |
| TRUE | Master Protein | F1S0S8         | General transcription factor 3C polypeptide 4 OS=Sus scrofa OX=9823 GN=GTF3C4 PE=1 SV=2                          | 1  | 1 | 1 | 1 | 679  | 76.7  | 7.36  | 2.26 | 1 | 1 |
| TRUE | Master Protein | F1S4S0         | Homeobox domain-containing protein OS=Sus scrofa OX=9823 GN=VAX1 PE=3 SV=1                                       | 3  | 1 | 1 | 1 | 333  | 34.6  | 9.38  | 2.22 | 1 | 1 |
| TRUE | Master Protein | A0A480N<br>QW0 | CUGBP Elav-like family member 2 isoform 2 OS=Sus scrofa OX=9823 PE=3 SV=1                                        | 2  | 1 | 1 | 1 | 521  | 55.7  | 8.6   | 2.21 | 1 | 1 |
| TRUE | Master Protein | A0A287A<br>286 | TRASH domain-containing protein OS=Sus scrofa OX=9823 GN=RPL24 PE=1 SV=1                                         | 4  | 1 | 1 | 1 | 217  | 24.7  | 11.5  | 2.21 | 1 | 1 |

|      |                |            |                                                                                                   |   |   |   |   |      |       |       |      |   |   |
|------|----------------|------------|---------------------------------------------------------------------------------------------------|---|---|---|---|------|-------|-------|------|---|---|
| TRUE | Master Protein | A0A287A961 | Nipped-B protein OS=Sus scrofa OX=9823 GN=NIPBL PE=3 SV=2                                         | 0 | 1 | 1 | 1 | 2722 | 306.7 | 7.94  | 2.2  | 1 | 1 |
| TRUE | Master Protein | A0A286ZW96 | Homeobox domain-containing protein OS=Sus scrofa OX=9823 GN=SIX3 PE=4 SV=2                        | 5 | 1 | 1 | 1 | 333  | 35.5  | 8.63  | 2.18 | 1 | 1 |
| TRUE | Master Protein | A0A4X1SEZ3 | Poly [ADP-ribose] polymerase OS=Sus scrofa OX=9823 PE=4 SV=1                                      | 3 | 1 | 1 | 1 | 502  | 56.2  | 8.78  | 2.18 | 1 | 1 |
| TRUE | Master Protein | A0A287B8G0 | Multifunctional fusion protein OS=Sus scrofa OX=9823 GN=PKM PE=1 SV=2                             | 1 | 1 | 1 | 1 | 1090 | 121.2 | 7.96  | 2.18 | 1 | 1 |
| TRUE | Master Protein | A0A4X1TZH0 | Enhancer of rudimentary homolog OS=Sus scrofa OX=9823 PE=3 SV=1                                   | 7 | 1 | 1 | 1 | 176  | 20.2  | 6.2   | 2.17 | 1 | 1 |
| TRUE | Master Protein | A0A5G2QT89 | B-block_TFIIC domain-containing protein OS=Sus scrofa OX=9823 GN=GTF3C1 PE=1 SV=1                 | 0 | 1 | 1 | 1 | 2012 | 227.1 | 7.74  | 2.17 | 1 | 1 |
| TRUE | Master Protein | A0A287AGI3 | Splicing factor U2AF 35 kDa subunit OS=Sus scrofa OX=9823 GN=U2AF1 PE=4 SV=1                      | 4 | 1 | 1 | 1 | 239  | 27.8  | 8.68  | 2.16 | 1 | 1 |
| TRUE | Master Protein | I3LJ87     | 40S ribosomal protein S2 OS=Sus scrofa OX=9823 GN=RPS2 PE=1 SV=3                                  | 6 | 1 | 1 | 1 | 266  | 29.1  | 10.18 | 2.15 | 1 | 1 |
| TRUE | Master Protein | I3LIR0     | Polyhomeotic-like protein 2 isoform a OS=Sus scrofa OX=9823 GN=PHC2 PE=1 SV=2                     | 1 | 1 | 1 | 1 | 887  | 93.7  | 9.03  | 2.15 | 1 | 1 |
| TRUE | Master Protein | Q0QEM6     | ATP synthase subunit beta (Fragment) OS=Sus scrofa OX=9823 GN=ATP5B PE=2 SV=1                     | 4 | 1 | 1 | 1 | 437  | 47.1  | 5.11  | 2.14 | 1 | 1 |
| TRUE | Master Protein | A0A481A1C4 | Keratin, type I cytoskeletal 27 OS=Sus scrofa OX=9823 PE=4 SV=1                                   | 3 | 1 | 1 | 1 | 264  | 29.8  | 4.74  | 2.14 | 1 | 1 |
| TRUE | Master Protein | A0A4X1TH57 | Very-long-chain (3R)-3-hydroxyacyl-CoA dehydratase OS=Sus scrofa OX=9823 GN=HACD3 PE=3 SV=1       | 2 | 1 | 1 | 1 | 362  | 43.2  | 9.2   | 2.12 | 1 | 1 |
| TRUE | Master Protein | A0A4X1SY17 | Ribonucleoprotein OS=Sus scrofa OX=9823 PE=3 SV=1                                                 | 9 | 1 | 1 | 1 | 128  | 14.1  | 8.73  | 2.11 | 1 | 1 |
| TRUE | Master Protein | A0A4X1VS56 | Arf-GAP domain-containing protein OS=Sus scrofa OX=9823 GN=ARFGAP2 PE=4 SV=1                      | 3 | 1 | 1 | 1 | 384  | 42    | 7.34  | 2.09 | 1 | 1 |
| TRUE | Master Protein | G9F6X9     | Dihydropyrimidinase-related protein 2 OS=Sus scrofa OX=9823 PE=2 SV=1                             | 1 | 1 | 1 | 1 | 572  | 62.3  | 6.16  | 2.09 | 1 | 1 |
| TRUE | Master Protein | A0A287BGL3 | 60S acidic ribosomal protein P0 OS=Sus scrofa OX=9823 GN=RPLP0 PE=3 SV=1                          | 3 | 1 | 1 | 1 | 319  | 35.5  | 9.64  | 2.08 | 1 | 1 |
| TRUE | Master Protein | F1S086     | Calcium-binding mitochondrial carrier protein Aralar1 OS=Sus scrofa OX=9823 GN=SLC25A12 PE=1 SV=3 | 2 | 1 | 1 | 1 | 677  | 74.7  | 8.27  | 2.06 | 1 | 1 |
| TRUE | Master Protein | A0A4X1UBG5 | ATP-dependent RNA helicase DDX1 OS=Sus scrofa OX=9823 GN=DDX1 PE=3 SV=1                           | 1 | 1 | 1 | 1 | 740  | 82.5  | 7.23  | 2.06 | 1 | 1 |
| TRUE | Master Protein | A0A287BNP8 | CRAL-TRIO domain-containing protein OS=Sus scrofa OX=9823 GN=RLBP1 PE=1 SV=1                      | 2 | 1 | 1 | 1 | 319  | 37.1  | 5.33  | 2.06 | 1 | 1 |
| TRUE | Master Protein | B6V8C8     | 40S ribosomal protein S3a OS=Sus scrofa OX=9823 GN=RPS3A PE=1 SV=1                                | 3 | 1 | 1 | 1 | 264  | 29.9  | 9.74  | 2.05 | 1 | 1 |
| TRUE | Master Protein | A0A4X1VU19 | Robl_LC7 domain-containing protein OS=Sus scrofa OX=9823 GN=LAMTOR2 PE=3 SV=1                     | 8 | 1 | 1 | 1 | 125  | 13.5  | 5.4   | 2.04 | 1 | 1 |
| TRUE | Master Protein | A0A4X1WCH9 | SWIB domain-containing protein OS=Sus scrofa OX=9823 GN=SMARCD1 PE=3 SV=1                         | 3 | 1 | 1 | 1 | 515  | 58.2  | 9.25  | 2.04 | 1 | 1 |

|      |                |            |                                                                                                      |   |   |   |   |      |       |       |      |   |   |
|------|----------------|------------|------------------------------------------------------------------------------------------------------|---|---|---|---|------|-------|-------|------|---|---|
| TRUE | Master Protein | A0A5G2QWT4 | Alpha_adaptinC2 domain-containing protein OS=Sus scrofa OX=9823 GN=AP2A2 PE=1 SV=1                   | 1 | 1 | 1 | 1 | 857  | 94.2  | 6.27  | 2.03 | 1 | 1 |
| TRUE | Master Protein | A0A4X1SW39 | Sodium/potassium-transporting ATPase subunit alpha OS=Sus scrofa OX=9823 GN=ATP1A1 PE=3 SV=1         | 1 | 1 | 1 | 1 | 1018 | 112.3 | 5.68  | 2.03 | 1 | 1 |
| TRUE | Master Protein | A0A287A4H2 | Transcriptional activator protein Pur-beta OS=Sus scrofa OX=9823 GN=PURB PE=1 SV=1                   | 2 | 1 | 1 | 1 | 308  | 32.9  | 5.43  | 2.03 | 1 | 1 |
| TRUE | Master Protein | A0A287AZ57 | Nsp1_C domain-containing protein OS=Sus scrofa OX=9823 GN=NUP62 PE=1 SV=1                            | 2 | 1 | 1 | 1 | 478  | 49.1  | 5.43  | 2.02 | 1 | 1 |
| TRUE | Master Protein | A0A286ZPW3 | WD_REPEATS_REGION domain-containing protein OS=Sus scrofa OX=9823 GN=STRN3 PE=1 SV=1                 | 1 | 1 | 1 | 1 | 760  | 83    | 5.17  | 2.02 | 1 | 1 |
| TRUE | Master Protein | A0A4X1SWE0 | Carbonate dehydratase IV OS=Sus scrofa OX=9823 PE=3 SV=1                                             | 4 | 1 | 1 | 1 | 311  | 35.2  | 7.53  | 2.02 | 1 | 1 |
| TRUE | Master Protein | F1SGD0     | F-box-like/WD repeat-containing protein TBL1XR1 isoform 1 OS=Sus scrofa OX=9823 GN=TBL1XR1 PE=4 SV=3 | 3 | 1 | 1 | 1 | 514  | 55.6  | 5.55  | 2    | 1 | 1 |
| TRUE | Master Protein | A0A287A452 | Ribosomal protein L15 OS=Sus scrofa OX=9823 GN=RPL15 PE=1 SV=1                                       | 4 | 1 | 1 | 1 | 187  | 21.9  | 10.92 | 2    | 1 | 1 |
| TRUE | Master Protein | A0A287BIZ5 | Protein RUFY3 isoform X4 OS=Sus scrofa OX=9823 GN=RUFY3 PE=1 SV=1                                    | 2 | 1 | 1 | 1 | 597  | 67.8  | 5.87  | 2    | 1 | 1 |
| TRUE | Master Protein | A0A4X1UKP8 | DNA topoisomerase 2 OS=Sus scrofa OX=9823 GN=TOP2B PE=3 SV=1                                         | 1 | 1 | 1 | 1 | 1539 | 173.9 | 8.02  | 2    | 1 | 1 |
| TRUE | Master Protein | A0A4X1UCV9 | Importin N-terminal domain-containing protein OS=Sus scrofa OX=9823 GN=TNPO1 PE=4 SV=1               | 1 | 1 | 1 | 1 | 844  | 95.7  | 4.98  | 1.99 | 1 | 1 |
| TRUE | Master Protein | A0A4X1TQ26 | SCD domain-containing protein OS=Sus scrofa OX=9823 GN=STAG1 PE=3 SV=1                               | 1 | 1 | 1 | 1 | 1227 | 140.9 | 5.57  | 1.99 | 1 | 1 |
| TRUE | Master Protein | A0A287B109 | UPAR/Ly6 domain-containing protein OS=Sus scrofa OX=9823 GN=LYNX1 PE=4 SV=1                          | 9 | 1 | 1 | 1 | 116  | 12.5  | 7.05  | 1.99 | 1 | 1 |
| TRUE | Master Protein | K9J6I7     | Adducin 1 (Alpha) OS=Sus scrofa OX=9823 GN=ADD1 PE=2 SV=1                                            | 1 | 1 | 1 | 1 | 744  | 81.2  | 5.48  | 1.98 | 1 | 1 |
| TRUE | Master Protein | A0A4X1STI8 | Non-specific serine/threonine protein kinase OS=Sus scrofa OX=9823 GN=RPS6KA5 PE=3 SV=1              | 1 | 1 | 1 | 1 | 957  | 105.6 | 7.96  | 1.98 | 1 | 1 |
| TRUE | Master Protein | A0A480JG04 | Splicing factor 3B subunit 3 OS=Sus scrofa OX=9823 PE=4 SV=1                                         | 1 | 1 | 1 | 1 | 1118 | 124.2 | 5.31  | 1.98 | 1 | 1 |
| TRUE | Master Protein | A0A4X1UJJ1 | Kinesin-like protein OS=Sus scrofa OX=9823 PE=3 SV=1                                                 | 2 | 1 | 1 | 1 | 679  | 76.9  | 6.4   | 1.98 | 1 | 1 |
| TRUE | Master Protein | A0A2C9F391 | Major prion protein OS=Sus scrofa OX=9823 GN=PRNP PE=1 SV=1                                          | 3 | 1 | 1 | 1 | 256  | 27.6  | 9.32  | 1.97 | 1 | 1 |
| TRUE | Master Protein | A0A4X1TXT9 | E3 ubiquitin-protein ligase TRIP12 OS=Sus scrofa OX=9823 GN=TRIP12 PE=3 SV=1                         | 1 | 1 | 1 | 1 | 1983 | 219.1 | 8.29  | 1.97 | 1 | 1 |
| TRUE | Master Protein | F1RPW9     | Elongation factor 1-gamma OS=Sus scrofa OX=9823 GN=EEF1G PE=4 SV=3                                   | 3 | 1 | 1 | 1 | 436  | 49.9  | 6.57  | 1.97 | 1 | 1 |
| TRUE | Master Protein | A0PFK6     | F-actin-capping protein subunit alpha OS=Sus scrofa OX=9823 GN=CP alpha2 PE=2 SV=1                   | 5 | 1 | 1 | 1 | 286  | 33    | 5.85  | 1.97 | 1 | 1 |
| TRUE | Master Protein | A0A480QJH2 | BCL2-associated athanogene 6 OS=Sus scrofa OX=9823 PE=4 SV=1                                         | 2 | 1 | 1 | 1 | 522  | 55.1  | 5.69  | 1.97 | 1 | 1 |

|      |                |             |                                                                                                    |   |   |   |   |      |          |             |          |        |     |
|------|----------------|-------------|----------------------------------------------------------------------------------------------------|---|---|---|---|------|----------|-------------|----------|--------|-----|
| TRUE | Master Protein | A0A2I2KH U2 | Genome polyprotein (Fragment) OS=Atypical porcine pestivirus OX=1914447 GN=NS2-3 PE=4 SV=1         | 2 | 1 | 1 | 1 | 962  | 107.6    | 7.12        | 1.96     | 1      | 1   |
| TRUE | Master Protein | A0A480JR B0 | Clathrin light chain OS=Sus scrofa OX=9823 PE=3 SV=1                                               | 3 | 1 | 1 | 1 | 229  | 25.2     | 4.6         | 1.95     | 1      | 1   |
| TRUE | Master Protein | A0A5G2Q WH1 | V-type proton ATPase subunit H OS=Sus scrofa OX=9823 GN=ATP6V1H PE=3 SV=1                          | 4 | 1 | 1 | 1 | 464  | 53.7     | 6.61        | 1.95     | 1      | 1   |
| TRUE | Master Protein | F1S8K5      | FACT complex subunit OS=Sus scrofa OX=9823 GN=SUPT16H PE=1 SV=2                                    | 1 | 1 | 1 | 1 | 1083 | 123.6    | 5.78        | 1.95     | 1      | 1   |
| TRUE | Master Protein | P62831      | 60S ribosomal protein L23 OS=Sus scrofa OX=9823 GN=RPL23 PE=1 SV=1                                 | 6 | 1 | 1 | 1 | 140  | 14.9     | 10.51       | 1.94     | 1      | 1   |
| TRUE | Master Protein | D2XZ48      | Non-structural protein 6 OS=Porcine reproductive and respiratory syndrome virus OX=28344 PE=2 SV=1 | 0 | 1 | 1 | 1 | 2502 | 271.2    | 7.5         | 1.93     | 1      | 1   |
| TRUE | Master Protein | A0A287A 1N9 | Zinc finger protein 385A isoform a OS=Sus scrofa OX=9823 GN=ZNF385A PE=1 SV=2                      | 3 | 1 | 1 | 1 | 387  | 40.6     | 9.86        | 1.93     | 1      | 1   |
| TRUE | Master Protein | A0A481D 3P3 | Transmembrane protein 43 OS=Sus scrofa OX=9823 PE=3 SV=1                                           | 2 | 1 | 1 | 1 | 400  | 44.9     | 7.71        | 1.92     | 1      | 1   |
| TRUE | Master Protein | A0A480M RU2 | DNA repair protein RAD50 OS=Sus scrofa OX=9823 PE=4 SV=1                                           | 2 | 1 | 1 | 1 | 511  | 59.5     | 8.73        | 1.92     | 1      | 1   |
| TRUE | Master Protein | A0A287A 3R3 | PDZ domain-containing protein OS=Sus scrofa OX=9823 GN=GIPC3 PE=3 SV=2                             | 3 | 1 | 1 | 1 | 314  | 34.3     | 5.6         | 1.92     | 1      | 1   |
| TRUE | Master Protein | F1RNL4      | Serine/threonine-protein phosphatase OS=Sus scrofa OX=9823 GN=PPP1CC PE=1 SV=4                     | 3 | 1 | 1 | 1 | 304  | 34.9     | 5.58        | 1.9      | 1      | 1   |
| TRUE | Master Protein | K7GNY4      | 60S ribosomal protein L8 OS=Sus scrofa OX=9823 GN=RPL8 PE=1 SV=3                                   | 5 | 1 | 1 | 1 | 225  | 24.6     | 11.02       | 1.9      | 1      | 1   |
| TRUE | Master Protein | A0A480J6 I6 | Lysine-specific demethylase 4A isoform X1 OS=Sus scrofa OX=9823 PE=4 SV=1                          | 1 | 1 | 1 | 1 | 821  | 91.8     | 5.33        | 1.9      | 1      | 1   |
| TRUE | Master Protein | A0A286ZJ L5 | V-type proton ATPase subunit D OS=Sus scrofa OX=9823 GN=ATP6V1D PE=1 SV=1                          | 3 | 1 | 1 | 1 | 247  | 28.2     | 9.36        | 1.9      | 1      | 1   |
| TRUE | Master Protein | K9IWE3      | Histone-lysine N-methyltransferase ASH1L OS=Sus scrofa OX=9823 GN=ASH1L PE=2 SV=2                  | 0 | 1 | 1 | 1 | 2958 | 331.4    | 9.38        | 1.9      | 1      | 1   |
|      |                |             |                                                                                                    |   |   |   |   | 2208 | 25034.19 | 3396285.408 | 10606.09 | 8317.3 | 386 |

**Table S3.** Matrisome components of retinal decellularized extracellular matrix (RdECM).

| Division             | Category               | Name                                        |
|----------------------|------------------------|---------------------------------------------|
| Core Matrisome       | Collagen               | Collagen, type XVIII, alpha 1               |
|                      | Proteoglycan           | Heparan sulfate proteoglycan 2              |
|                      | ECM Glycoprotein       | Agrin                                       |
|                      |                        | Laminin, beta 2 (laminin S)                 |
|                      |                        | Laminin, gamma 1 (formerly LAMB2)           |
|                      |                        | Nidogen 2 (osteonidogen)                    |
|                      |                        | Tubulointerstitial nephritis antigen-like 1 |
|                      |                        | Tenascin R (restrictin, janusin)            |
|                      |                        | Von Willebrand factor A domain containing 1 |
| Matrisome-associated | Secreted factor        | Fibroblast growth factor 2 (basic)          |
|                      | ECM-affiliated protein | S100 calcium binding protein A14            |
|                      |                        | Lectin, galactoside-binding, soluble, 1     |
